# Supplementary material for: Microwave-assisted synthesis of hydropyridines and study of the DPPH-scavenging activity
Source: Royal Society of Chemistry journal article supplement (doi:10.1039/c1ra01135a), 2012-01-01

# Microwave-Assisted Synthesis of Hydro-pyridine Derivatives and Study of the DPPH<sup>•</sup>-scavenging Activity

1 Facultad de Ciencias Químico Biológicas, Universidad Autónoma de Sinaloa. 80010 Culiacán, Sinaloa, México.

2 Centro de Graduados e Investigación, Instituto Tecnológico de Tijuana. PO Box 1166, 22000 Tijuana, B. C., México.

## Supporting Information

### <sup>1</sup>H and <sup>13</sup>C-NMR of compounds:

|                                                                                                                       |     |
|-----------------------------------------------------------------------------------------------------------------------|-----|
| General.....                                                                                                          | S3  |
| 2,7,7-Trimethyl-5-oxo-4-phenyl-1,4,5,6,7,8-hexahydroquinoline-3-carboxylic acid ethyl ester (5a).....                 | S4  |
| 4-(4-Methoxy-phenyl)-2,7,7-trimethyl-5-oxo-1,4,5,6,7,8-hexahydroquinoline-3-carboxylic acid ester (5b).....           | S5  |
| 4-(4-Hydroxy-3-methoxy-phenyl)-2,7,7-trimethyl-5-oxo-1,4,5,6,7,8-hexahydroquinoline-3-carboxylic acid ester (5c)..... | S6  |
| 4-(4-Ethoxy-3-hydroxy-phenyl)-2,7,7-trimethyl-5-oxo-1,4,5,6,7,8-hexahydroquinoline-3-carboxylic acid ester (5d).....  | S7  |
| 2,7,7-Trimethy-4-(4-nitro-phenyl)-5-oxo-1,4,5,6,7,8-hexahydroquinoline-3-carboxylic acid ester (5e).....              | S8  |
| 2,7,7-Trimethyl-4-(4-dimethylamino-phenyl)-5-oxo-1,4,5,6,7,8-hexahydroquinoline-3-carboxylic acid ester (5f).....     | S9  |
| 2,7,7-Trimethyl-5-oxo-4-iso-propyl-1,4,5,6,7,8-hexahydroquinoline-3-carboxylic acid ester (5g).....                   | S10 |
| 2,7,7-Trimethyl-5-oxo-4-pentyl-1,4,5,6,7,8-hexahydroquinoline-3-carboxylic acid ester (5h).....                       | S11 |
| 2-Methyl-5-oxo-4-phenyl-1,4,5,6,7,8-hexahydroquinoline-3-carboxylic acid ester (5i).....                              | S12 |
| 2-Methyl-4-(4-methoxy-phenyl)-5-oxo-1,4,5,6,7,8-hexahydroquinoline-3-carboxylic acid ester (5j).....                  | S13 |
| 4-(4-Hydroxy-phenyl)-2-methyl-5-oxo-1,4,5,6,7,8-hexahydroquinoline-3-carboxylic acid ester (5k).....                  | S14 |
| 4-(4-Hydroxy-3-methoxy-phenyl)-2-methyl-5-oxo-1,4,5,6,7,8-hexahydroquinoline-3-carboxylic acid ester (5l).....        | S15 |
| 4-(4-Ethoxy-3-hydroxy-phenyl)-2-methyl-5-oxo-1,4,5,6,7,8-hexahydroquinoline-3-carboxylic acid ester (5m).....         | S16 |
| 2-Methyl-4-(4-nitro-phenyl)-5-oxo-1,4,5,6,7,8-hexahydroquinoline-3-carboxylic acid ester (5n).....                    | S17 |
| 2-Methyl-5-oxo-4-iso-propyl-1,4,5,6,7,8-hexahydroquinoline-3-carboxylic acid ester (5o).....                          | S18 |
| 2-Methy-5-oxo-4-pentyl-1,4,5,6,7,8-hexahydroquinoline-3-carboxylic acid ester (5p).....                               | S19 |

|                                                                                                                                    |     |
|------------------------------------------------------------------------------------------------------------------------------------|-----|
| 2,7-Dimethyl-5-oxo-4-phenyl-1,4,5,6,7,8-hexahydroquinoline-3-carboxylic acid ester (5q).....                                       | S20 |
| 4-(4-Hydroxy-3-methoxy-phenyl)-2,7-dimethyl-5-oxo-1,4,5,6,7,8-hexahydroquinoline-3-carboxylic acid ester (5r).....                 | S21 |
| 4-(4-Ethoxy-3-hydroxy-phenyl)-2,7-dimethyl-5-oxo-1,4,5,6,7,8-hexahydroquinoline-3-carboxylic acid ester (5s).....                  | S22 |
| 2,4,7-Trimethyl-5-oxo-1,4,5,6,7,8-hexahydroquinoline-3-carboxylic acid ester (5t).....                                             | S23 |
| 2,6-Dimethyl-4-phenyl-1,4-dihydropyridine-3,5-dicarboxylic acid diester (6a).....                                                  | S24 |
| 4-(4-Methoxy-phenyl)-2,6-dimethyl-1,4-dihydropyridine-3,5-dicarboxylic acid diester (6b).....                                      | S25 |
| 4-(4-Hydroxy-3-methoxy-phenyl)-2,6-dimethyl-1,4-dihydropyridine-3,5-dicarboxylic acid diester (6c).....                            | S26 |
| 4-(4-Ethoxy-3-hydroxy-phenyl)-2,6-dimethyl-1,4-dihydropyridine-3,5-dicarboxylic acid diester (6d).....                             | S27 |
| 4-(4-Methyl-phenyl)-2,6-dimethyl-1,4-dihydropyridine-3,5-dicarboxylic acid diester (6e).....                                       | S28 |
| 2,4,6-Trimethyl-1,4-dihydropyridine-3,5-dicarboxylic acid diester (6f).....                                                        | S29 |
| 2,6-Dimethyl-4- <i>iso</i> -propyl-1,4-dihydropyridine-3,5-dicarboxylic acid diester (6g).....                                     | S30 |
| 2,6-Dimethyl-4-pentyl-1,4-dihydropyridine-3,5-dicarboxylic acid diester (6h).....                                                  | S31 |
| 3,3,6,6-Tetramethyl-4-Phenyl-3,4,6,7,9,10-hexahydro-2 <i>H</i> ,5 <i>H</i> -acridine-1,8-dione (7a).....                           | S32 |
| 3,3,6,6-Tetramethyl-9-(4-methoxy-phenyl)-3,4,6,7,9,10-hexahydro-2 <i>H</i> ,5 <i>H</i> -acridine-1,8-dione (7b).....               | S33 |
| 9-(4-Hydroxy-3-methoxy-phenyl)-3,3,6,6-tetramethyl-3,4,6,7,9,10-hexahydro-2 <i>H</i> ,5 <i>H</i> -acridine-1,8-dione (7c).....     | S34 |
| 9-(4-Ethoxy-3-hydroxy-phenyl)-3,3,6,6-tetramethyl-3,4,6,7,9,10-hexahydro-2 <i>H</i> ,5 <i>H</i> -acridine-1,8-dione (7d).....      | S35 |
| 9-(4- <i>N,N</i> -Dimethyl-phenyl)-3,3,6,6-tetramethyl-3,4,6,7,9,10-hexahydro-2 <i>H</i> ,5 <i>H</i> -acridine-1,8-dione (7e)..... | S36 |
| 9-(4-Methyl-phenyl)-3,3,6,6-tetramethyl-3,4,6,7,9,10-hexahydro-2 <i>H</i> ,5 <i>H</i> -acridine-1,8-dione (7f).....                | S37 |
| 9- <i>iso</i> -propyl-3,3,6,6-tetramethyl-3,4,6,7,9,10-hexahydro-2 <i>H</i> ,5 <i>H</i> -acridine-1,8-dione (7g).....              | S38 |
| 3,3,6,6-Tetramethyl-3,4,6,7,9,10-hexahydro-2 <i>H</i> ,5 <i>H</i> -acridine-1,8-dione (7h).....                                    | S39 |

**General:** All reagents were purchased in the higher quality available and were used without further purification. Thin-layer chromatography (TLC) was performed on silica gel F<sub>254</sub> plates (Merck). All compounds were detected using UV light. Melting points were obtained on an Electrothermal 88629 apparatus and were uncorrected. Infrared spectra (FTIR) were recorded on a Perkin Elmer FT-IR 1600 spectrophotometer with a KBr disk. <sup>1</sup>H and <sup>13</sup>C nuclear magnetic resonance spectra at 200 Hz and 50.289 Hz, respectively, were recorded on a Varian Mercury 200 MHz Spectrometer in CDCl<sub>3</sub> and DMSO-*d*<sub>6</sub> with TMS as internal standard. The chemical shifts are expressed as  $\delta$  values in parts per million (ppm) and the coupling constants (*J*) are given in hertz (Hz). Electrospray ionization mass spectra (ESI-MS) were obtained with an ion trap, and the intensities were reported as a percentage relative to the base peak after the corresponding *m/z* value. HRMS were obtained in an Agilent LCTOF, a high resolution TOF analyzer with Windows XP based OS and APCI/ESI ionization. The purity was obtained on a High Pressure Liquid Chromatograph 1090 series II, column HPC-18. Microwave equipment was a self-tuning single mode CEM Discover<sup>TM</sup> Focused Synthesizer. All the spectrophotometric data were acquired using an Spectronic<sup>®</sup> 20Genesys<sup>TM</sup>.

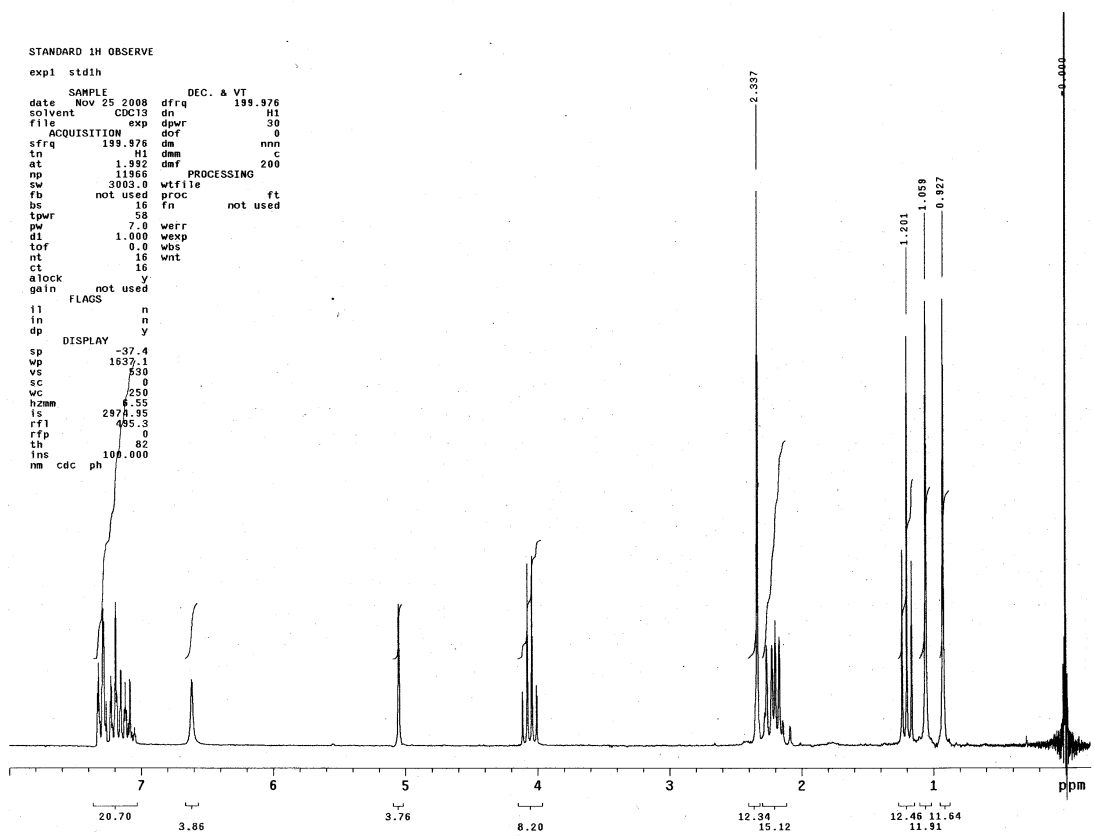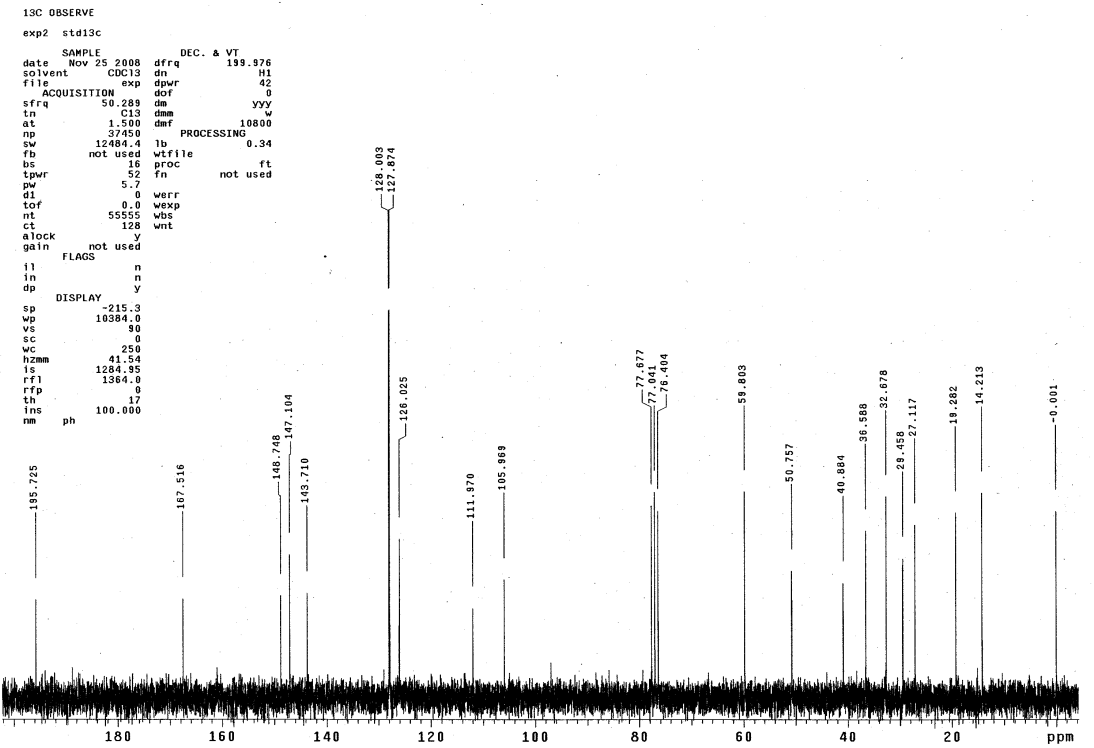

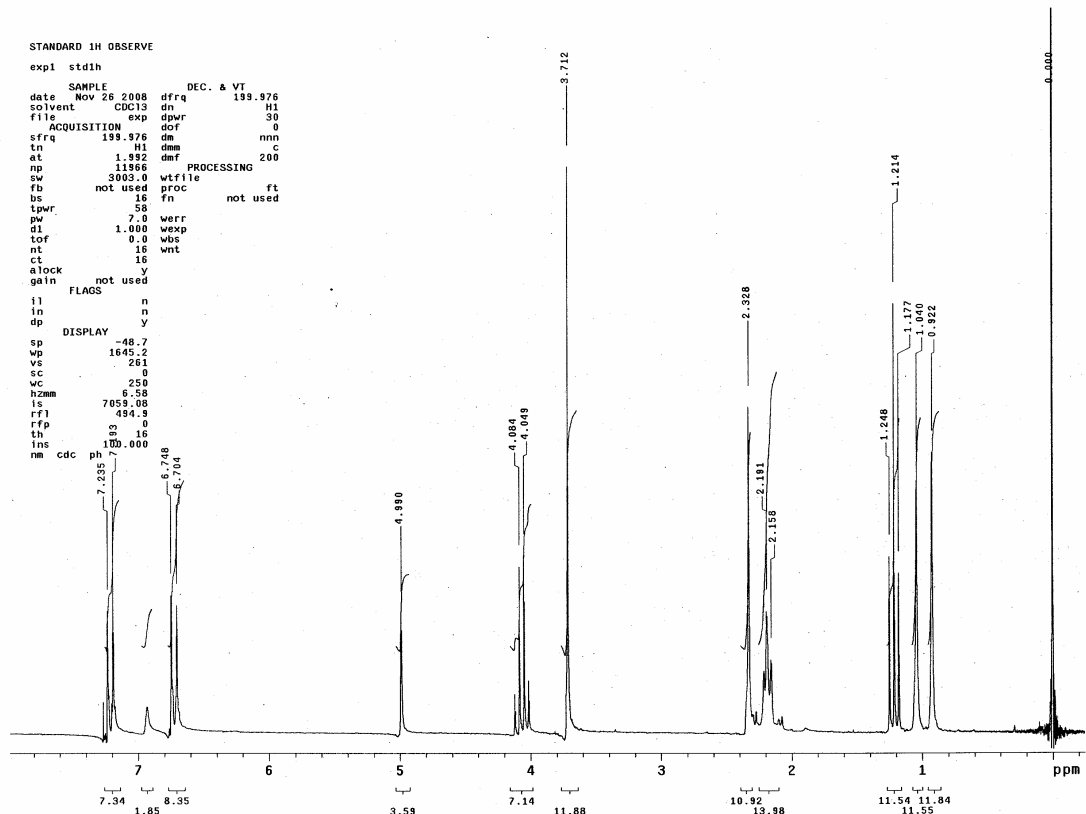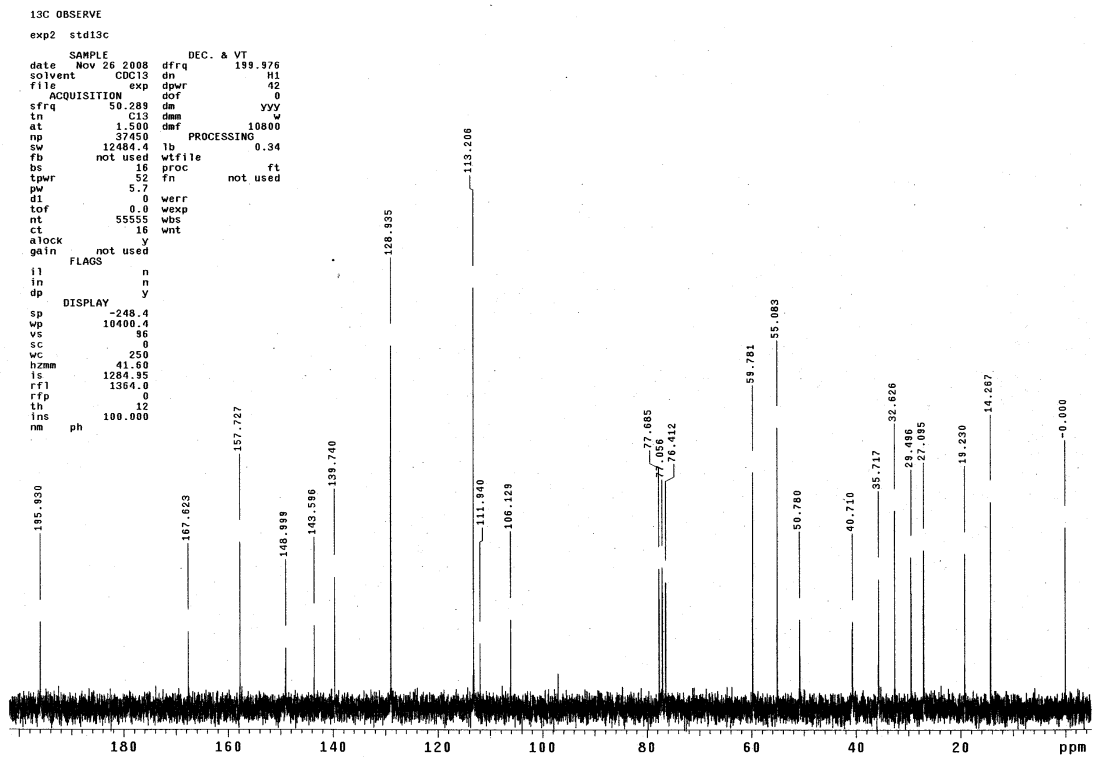

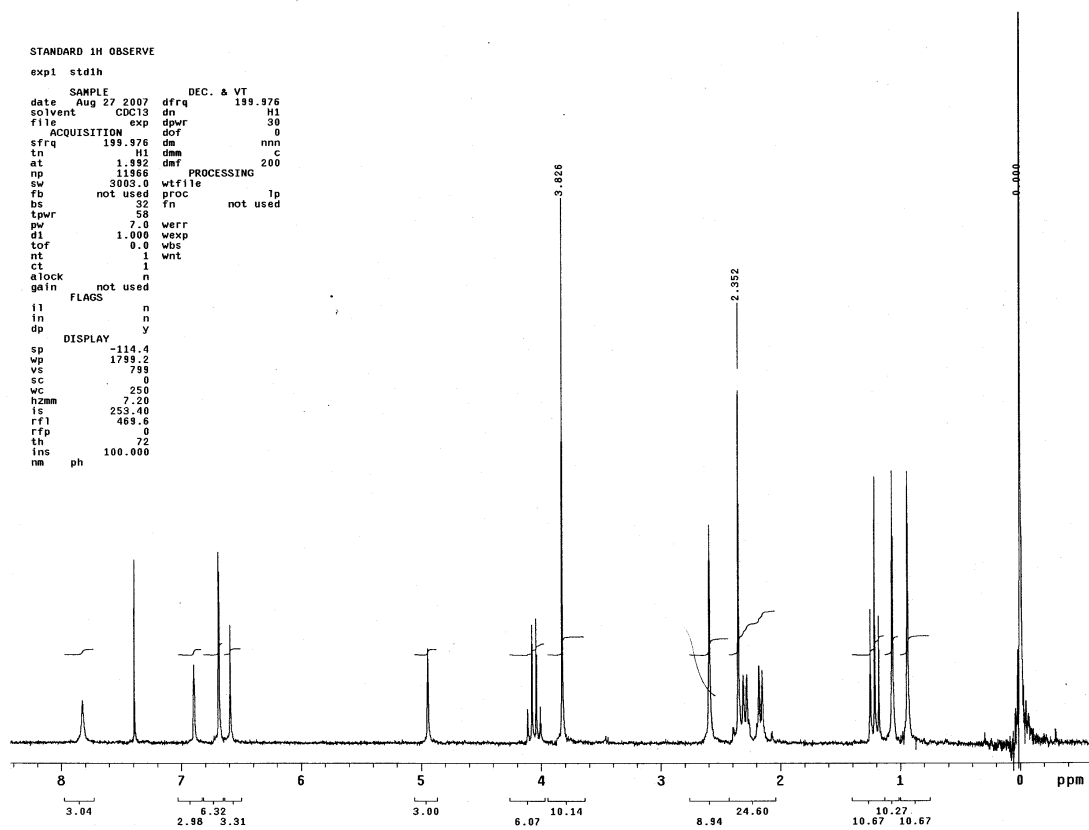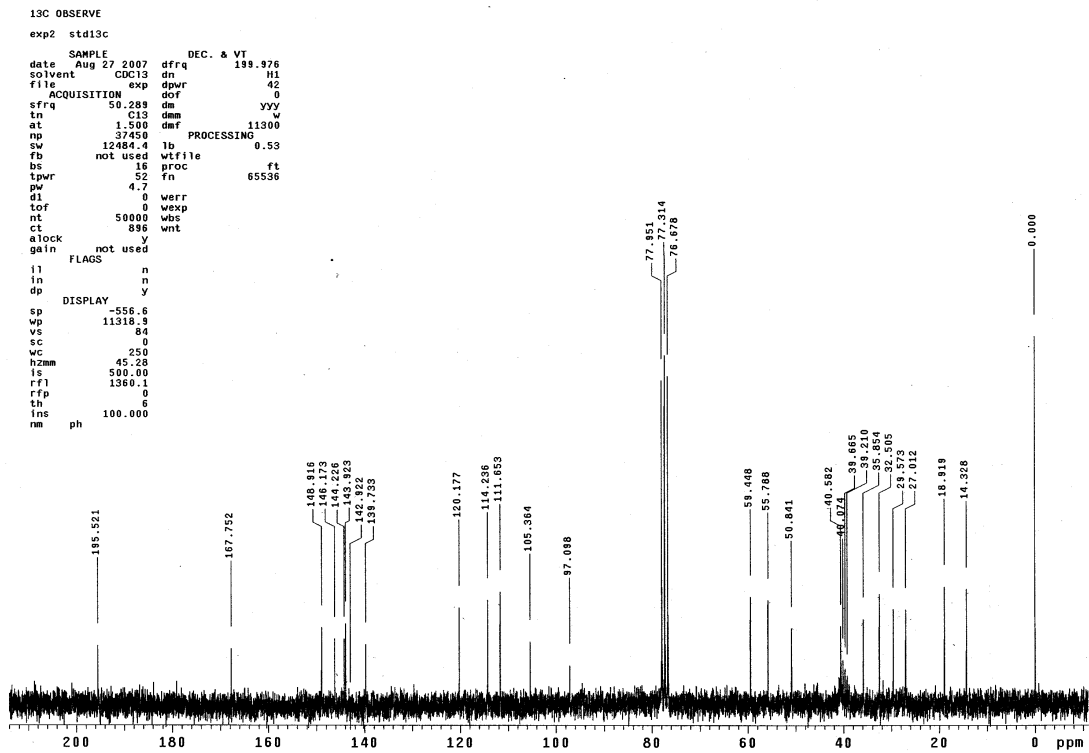

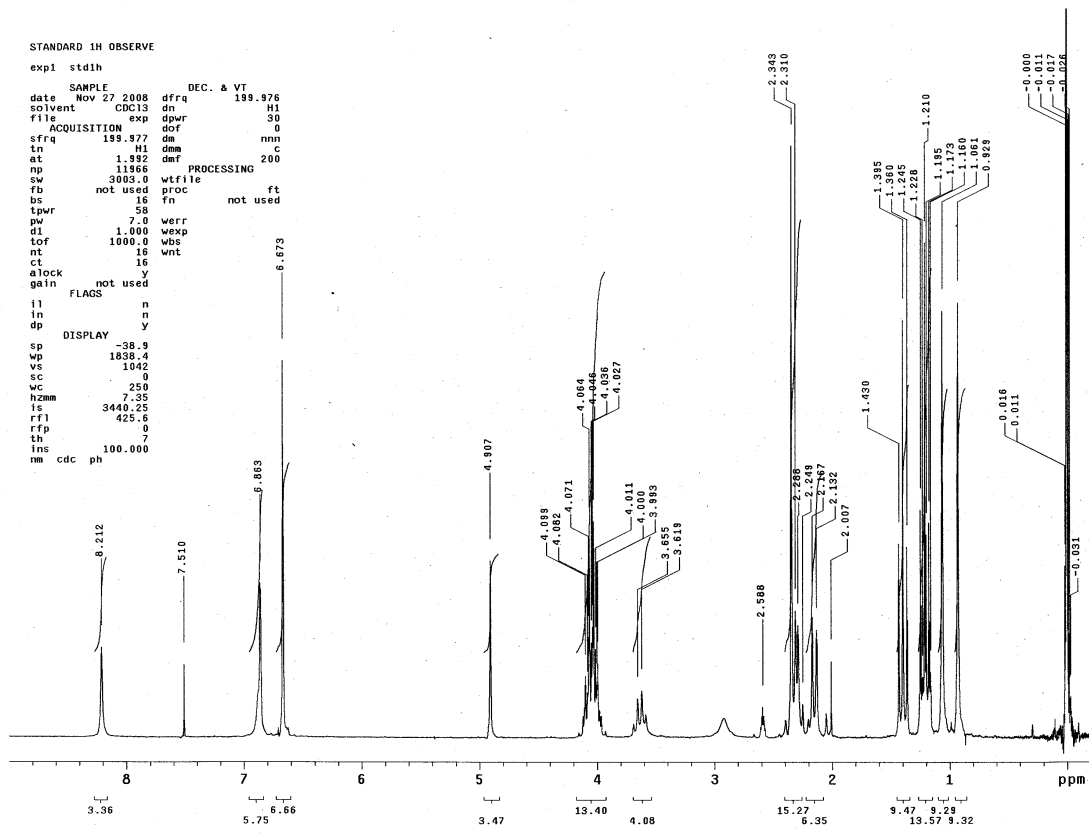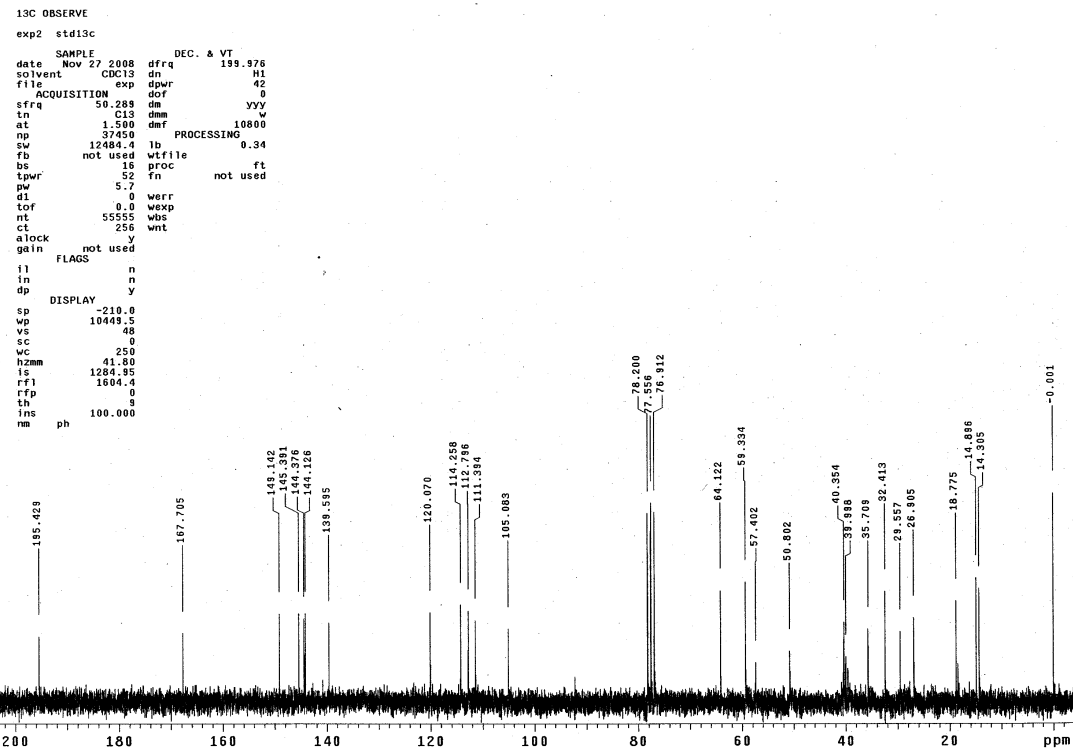

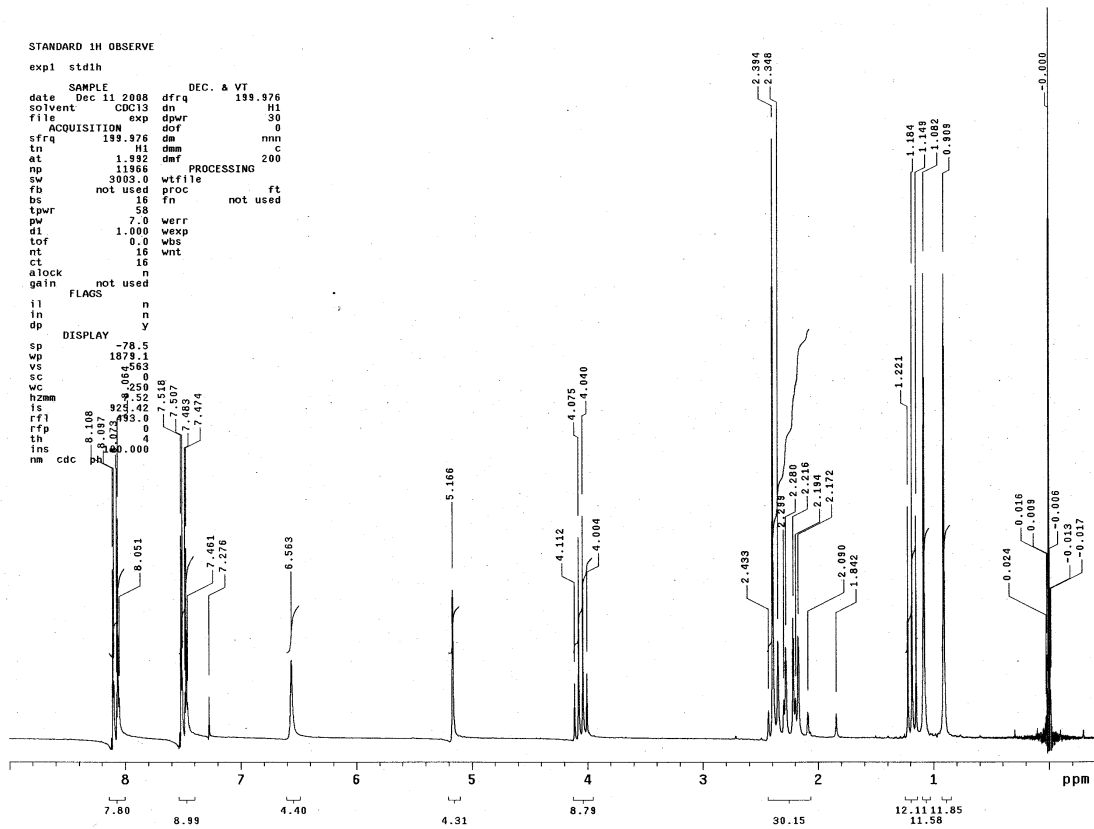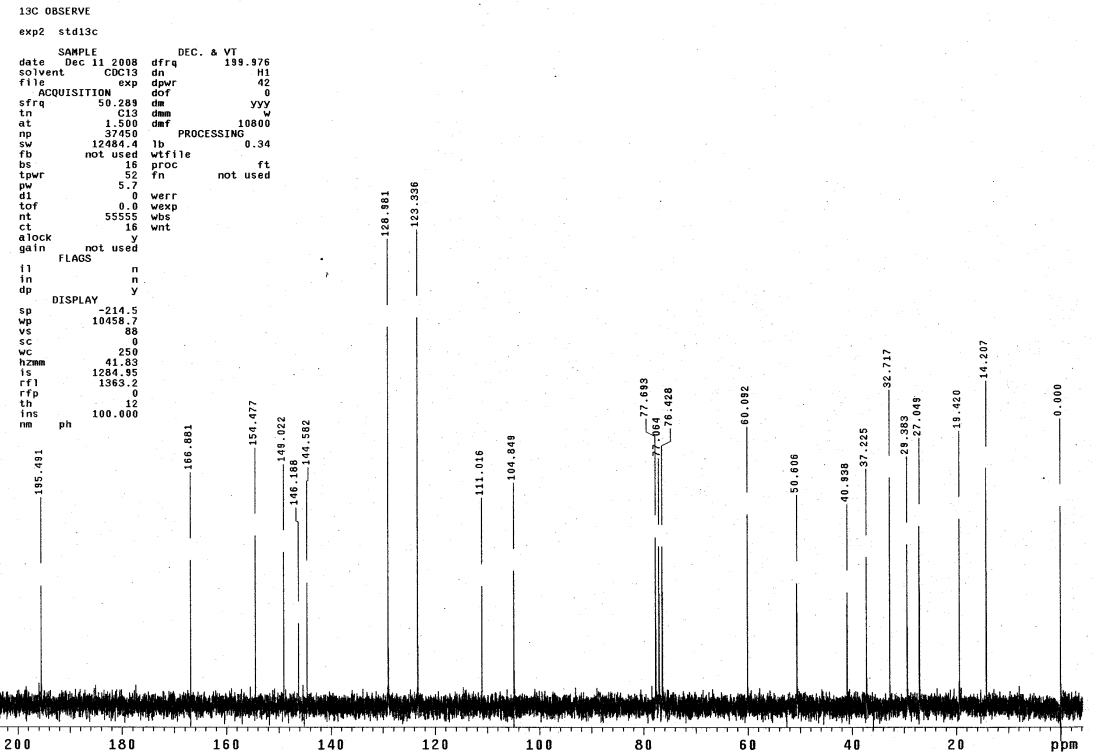



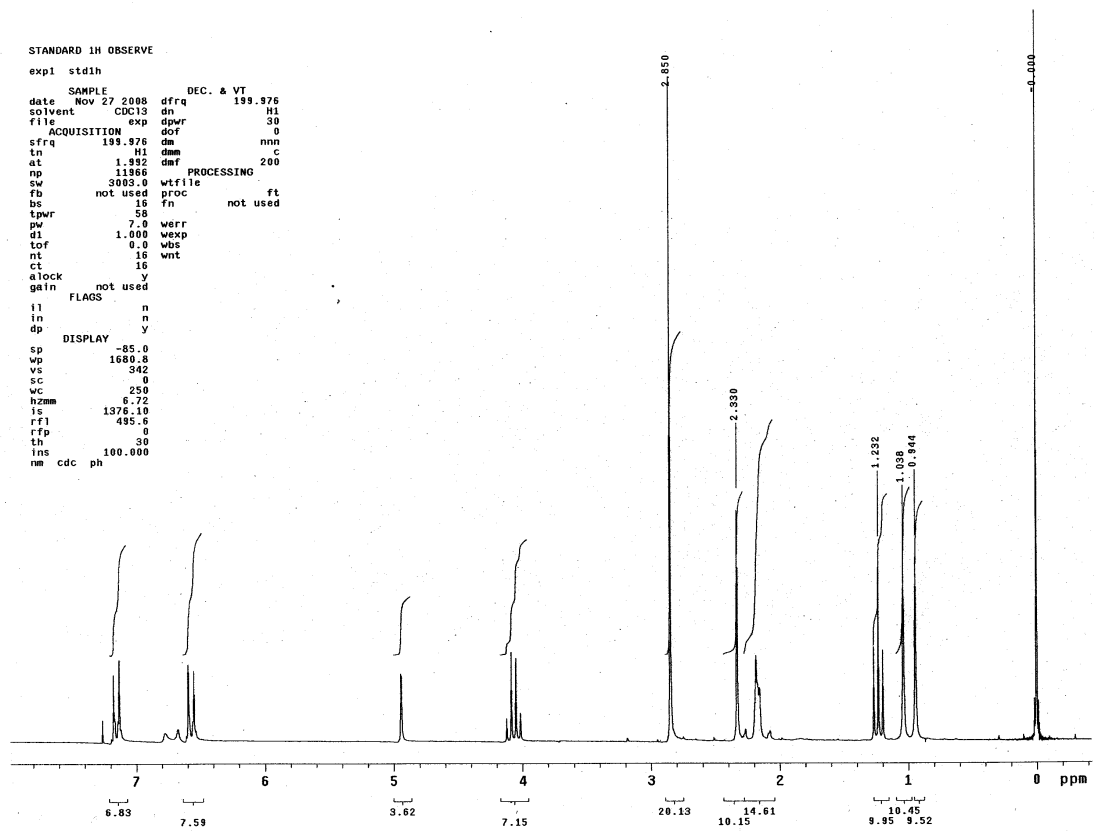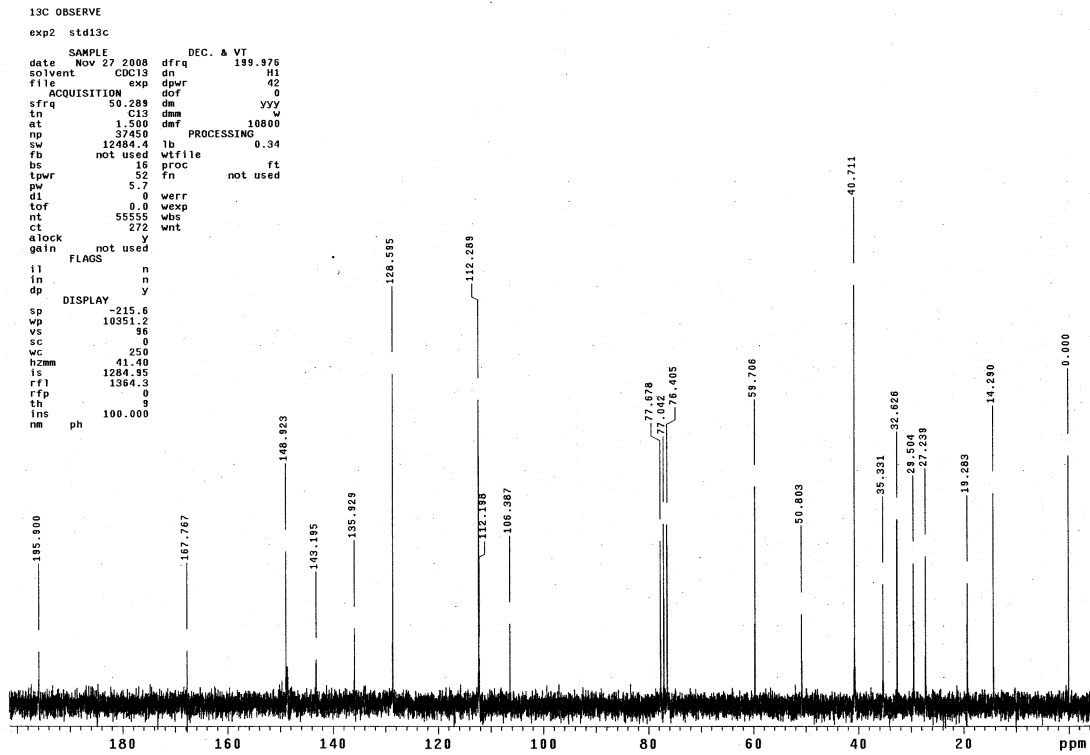

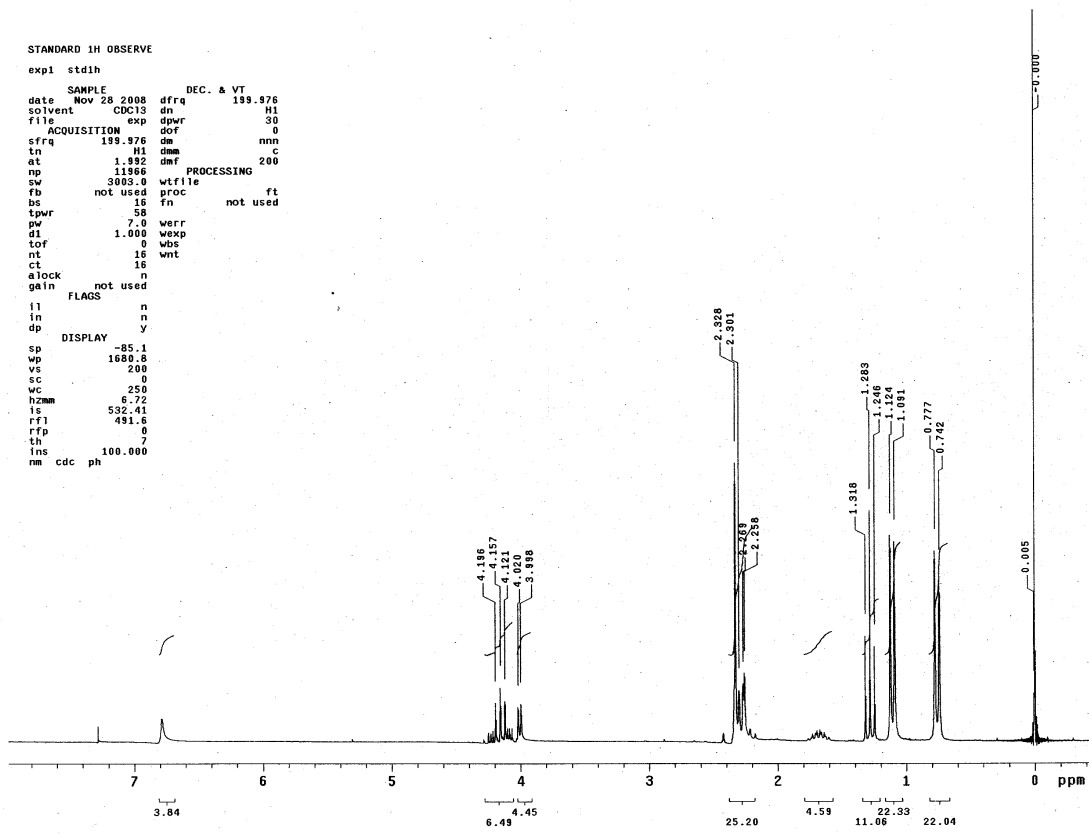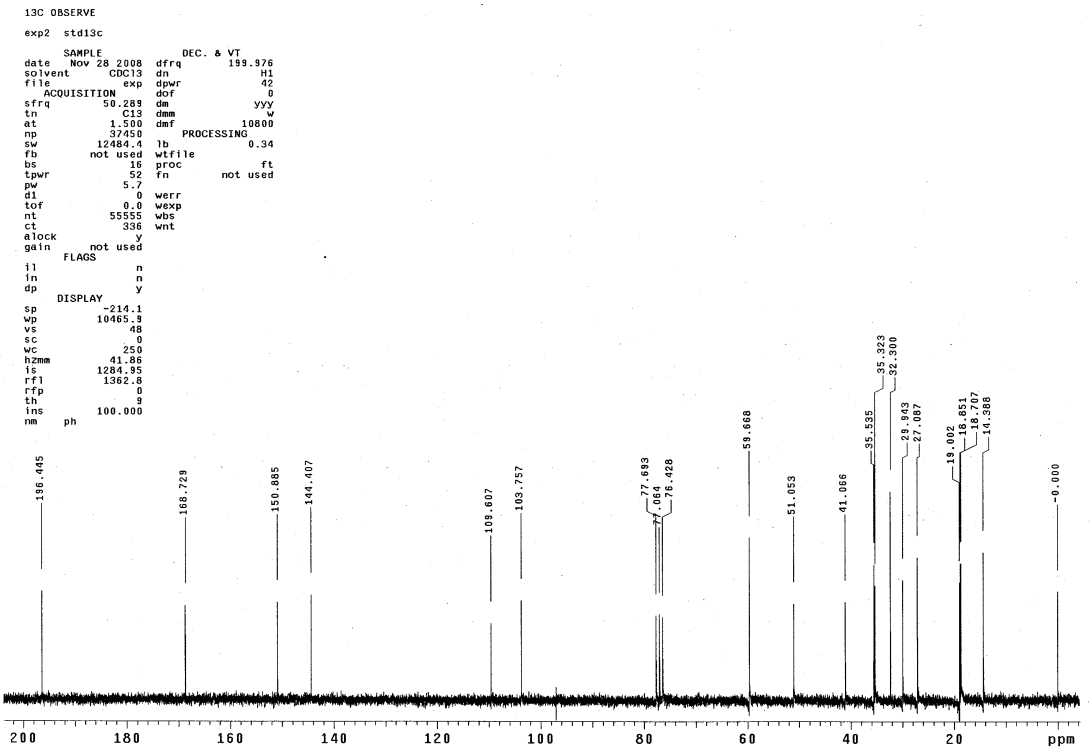

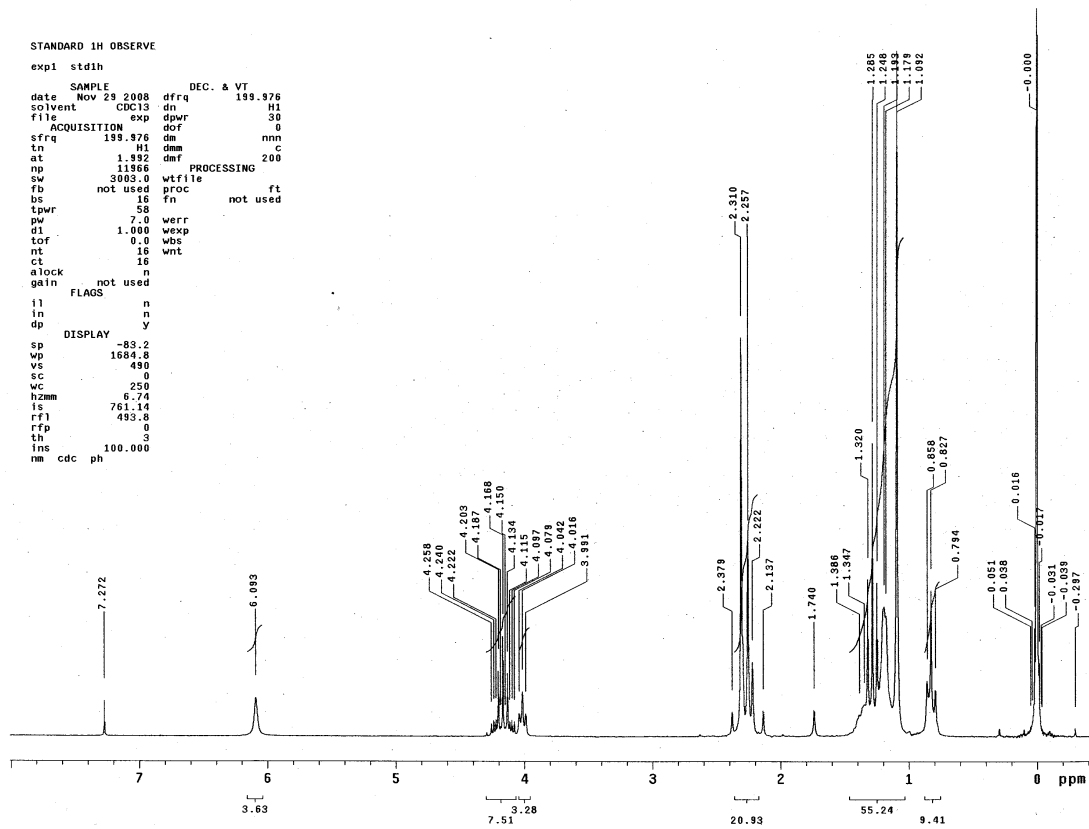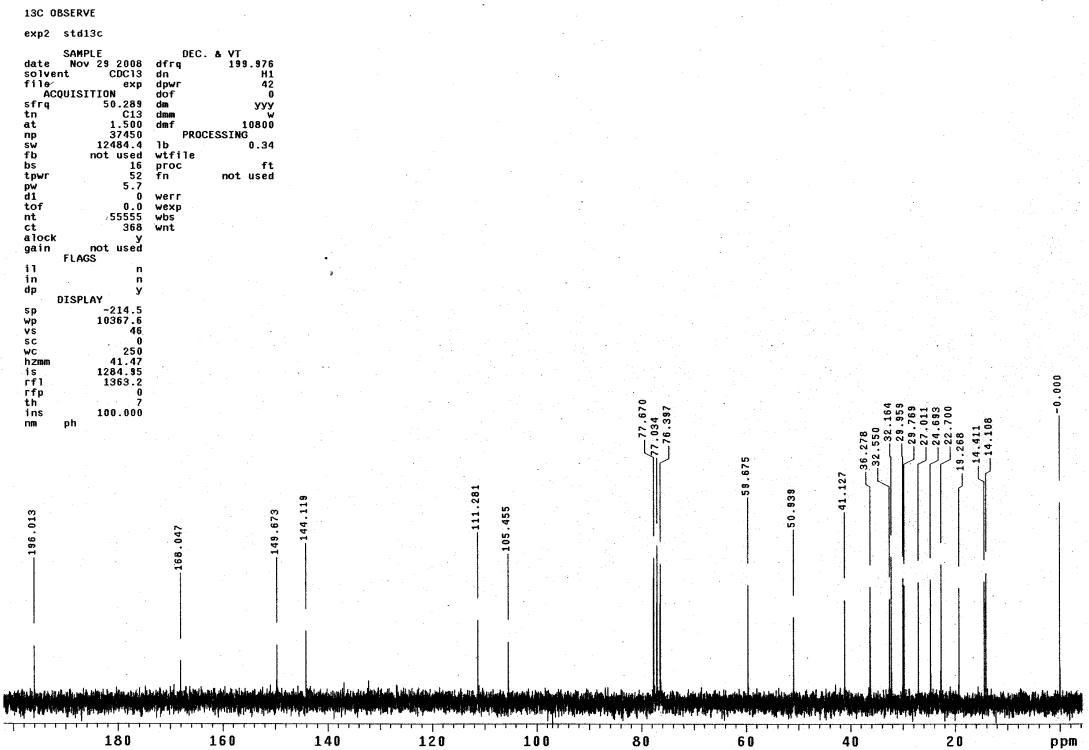

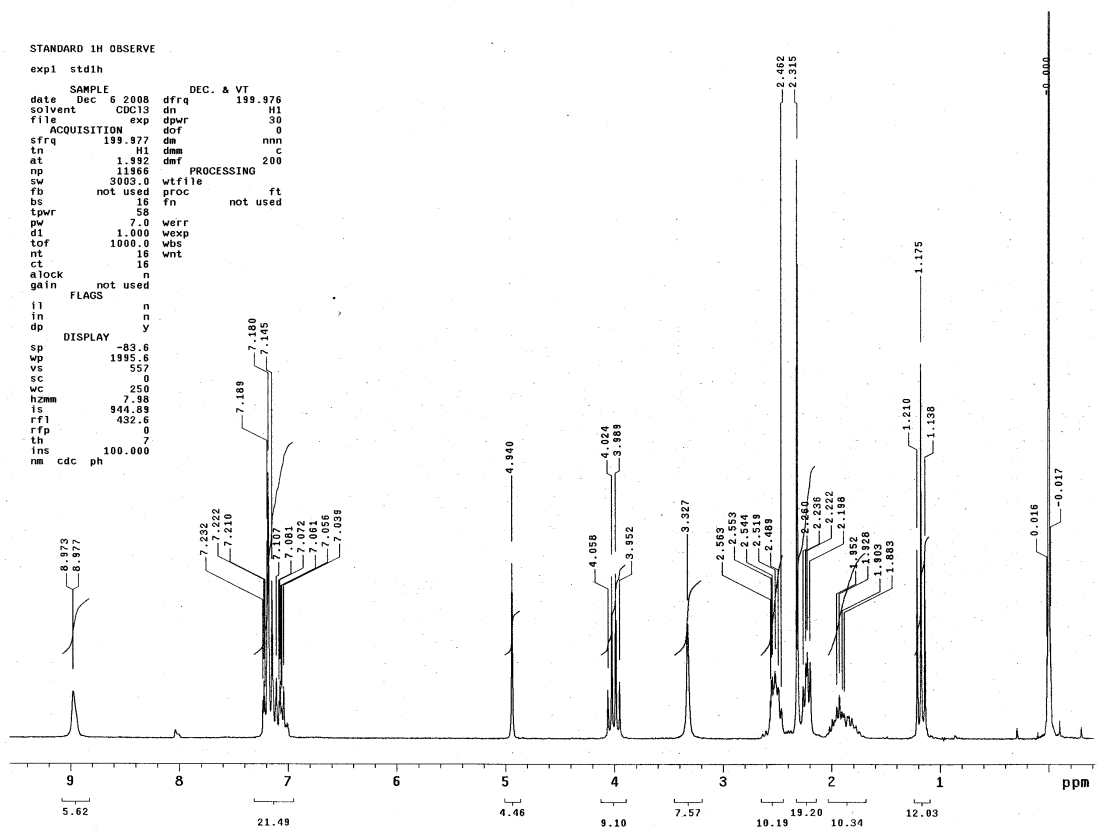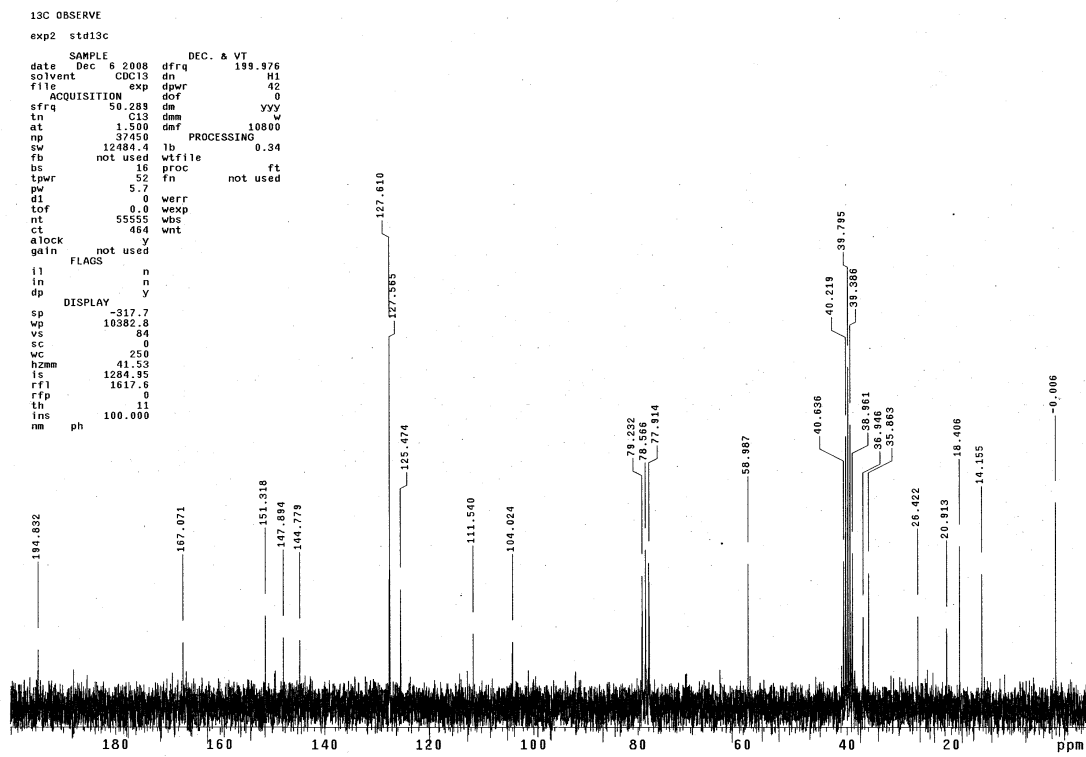

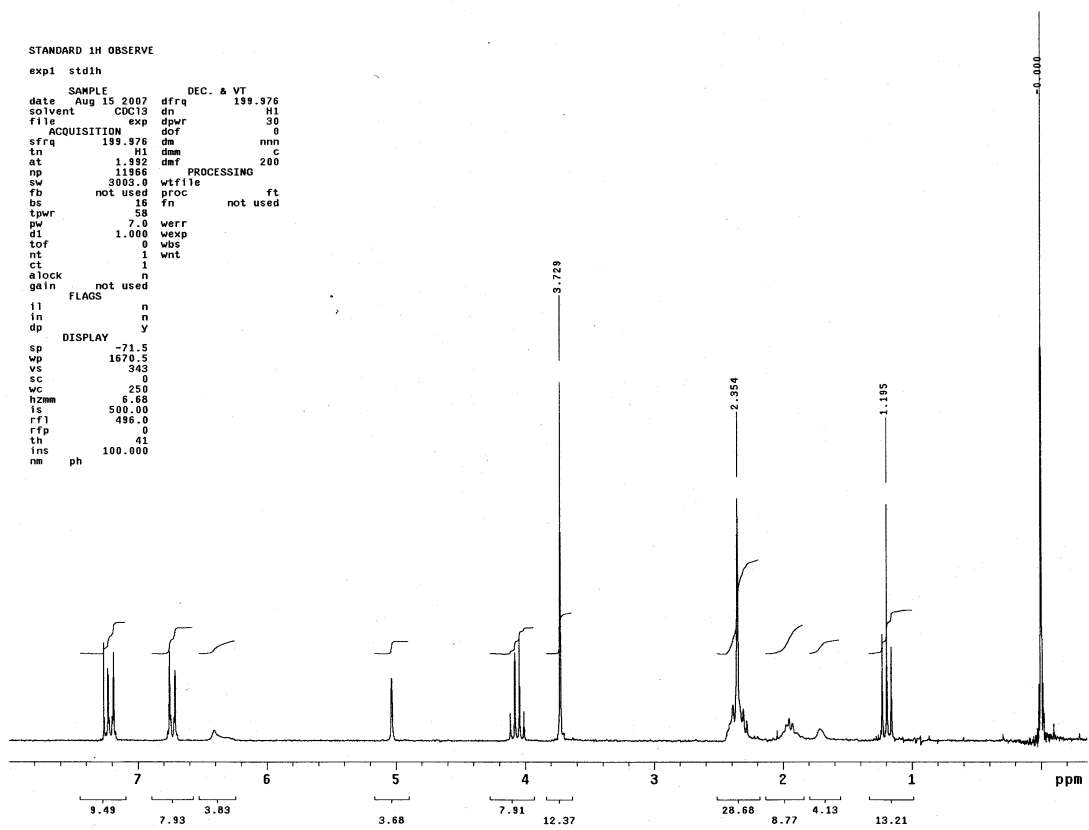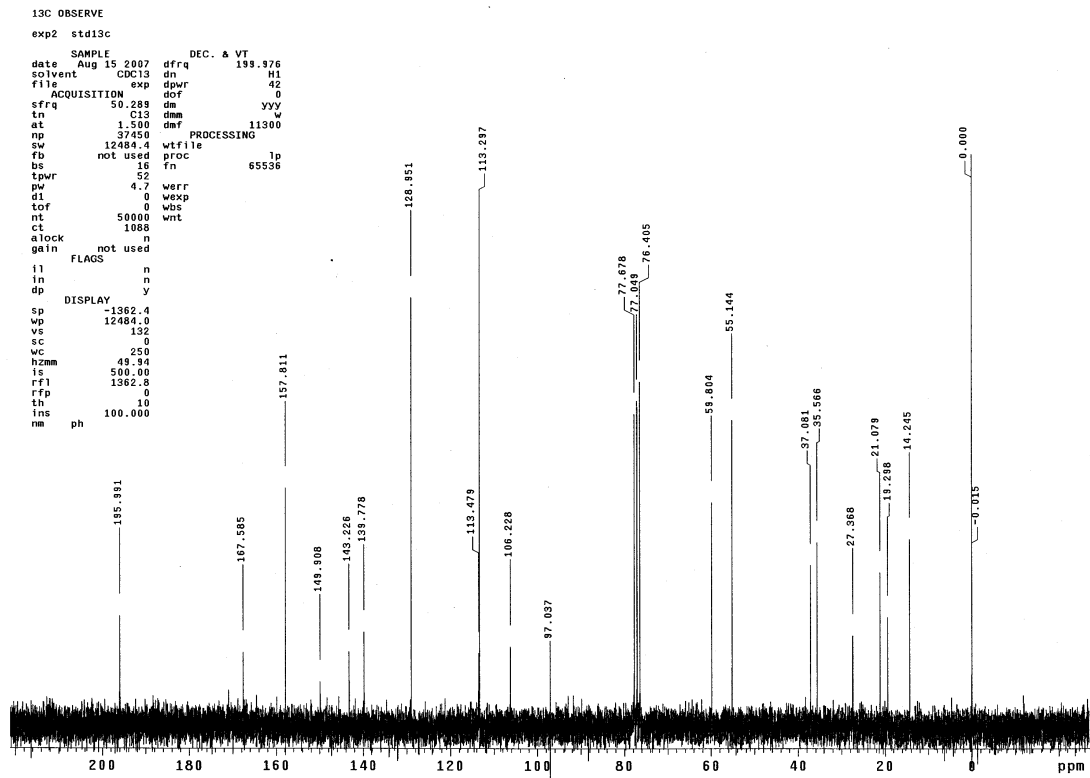

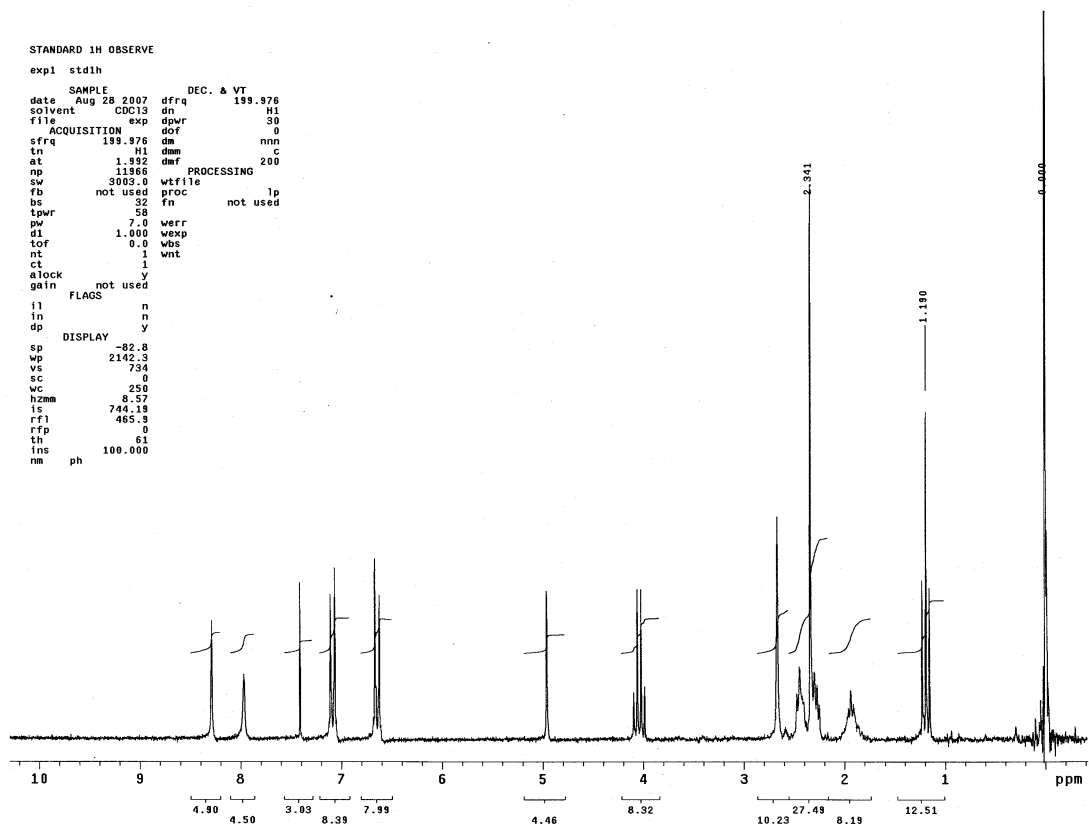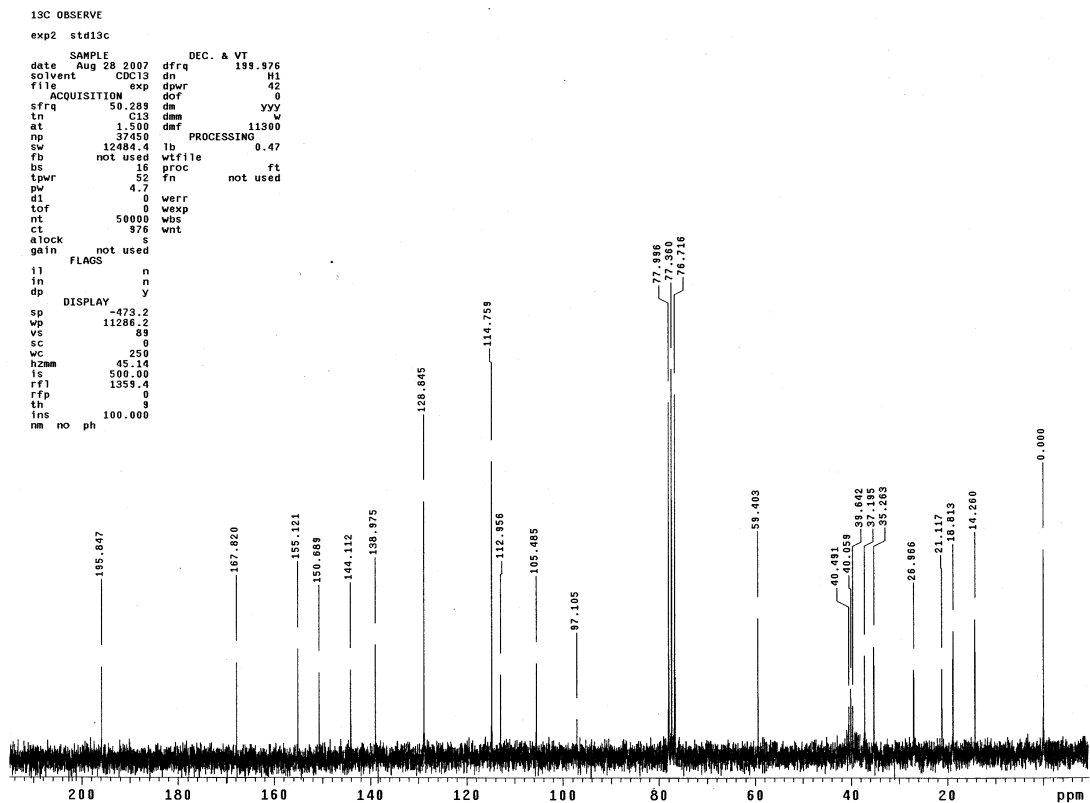

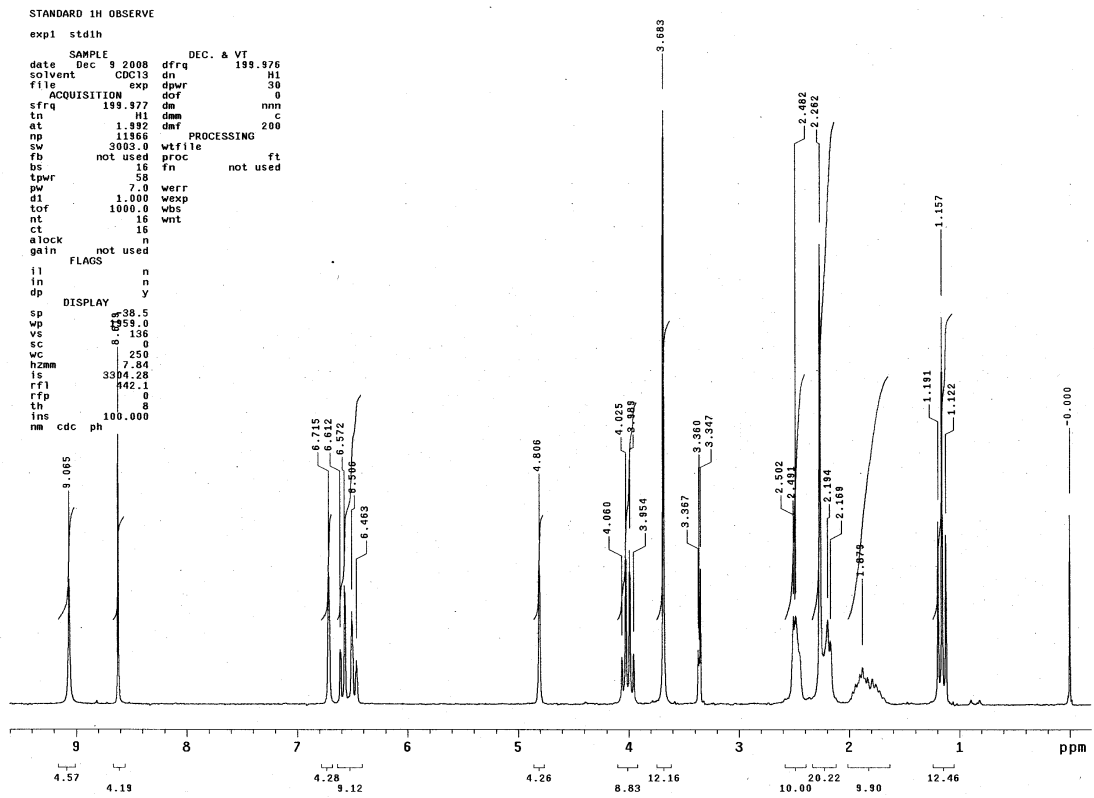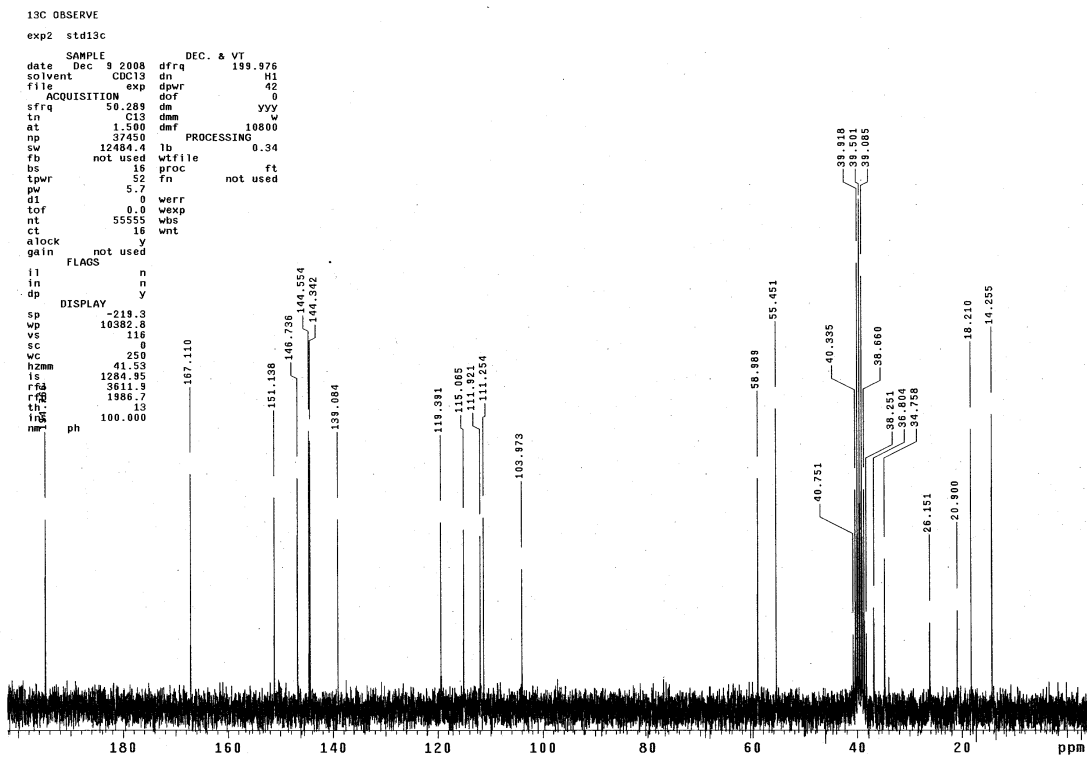

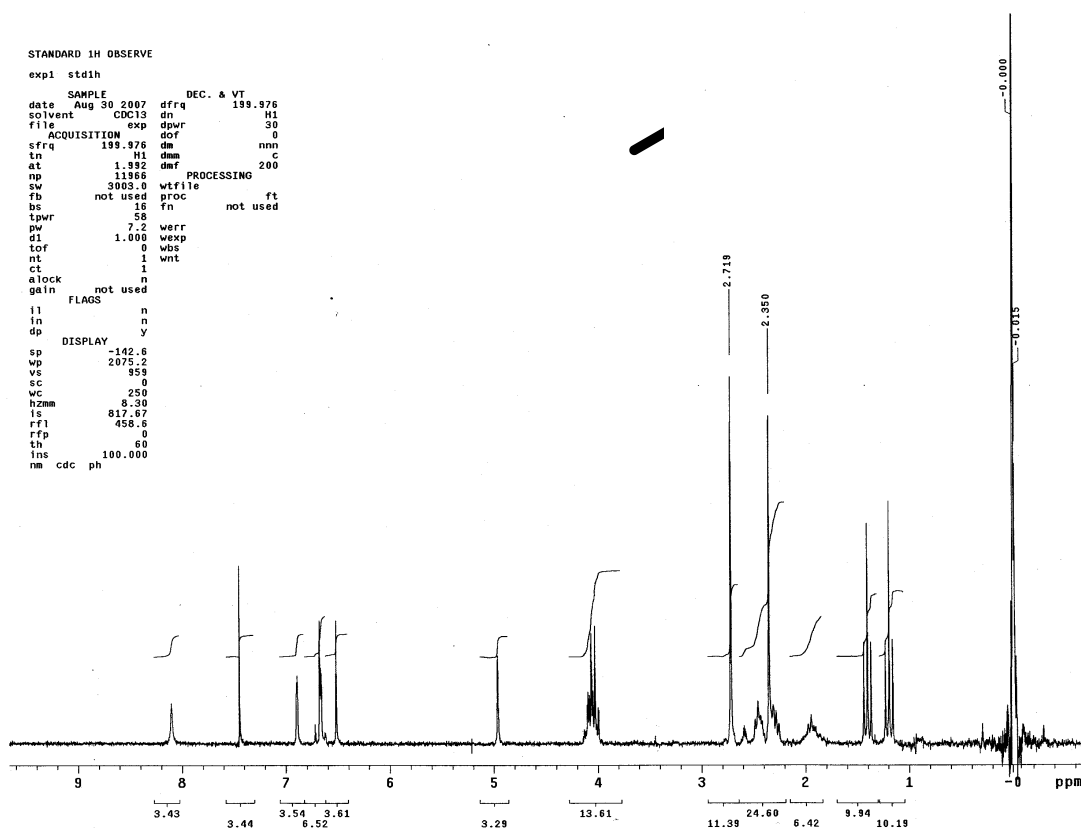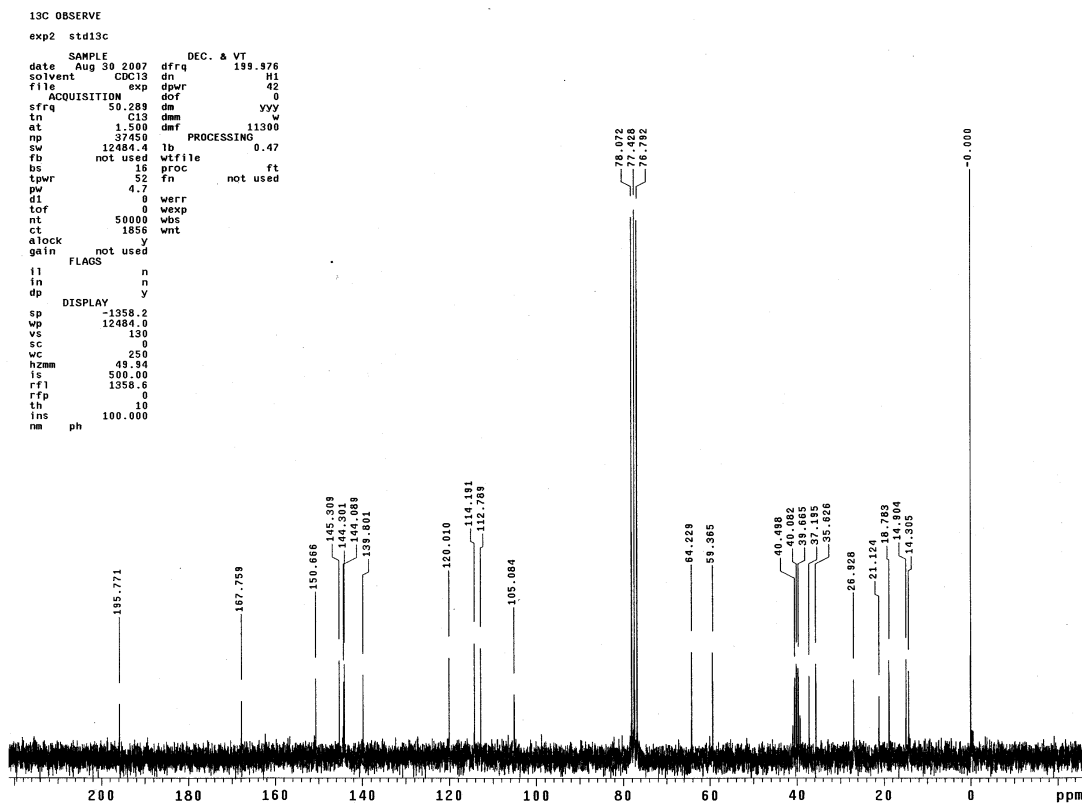



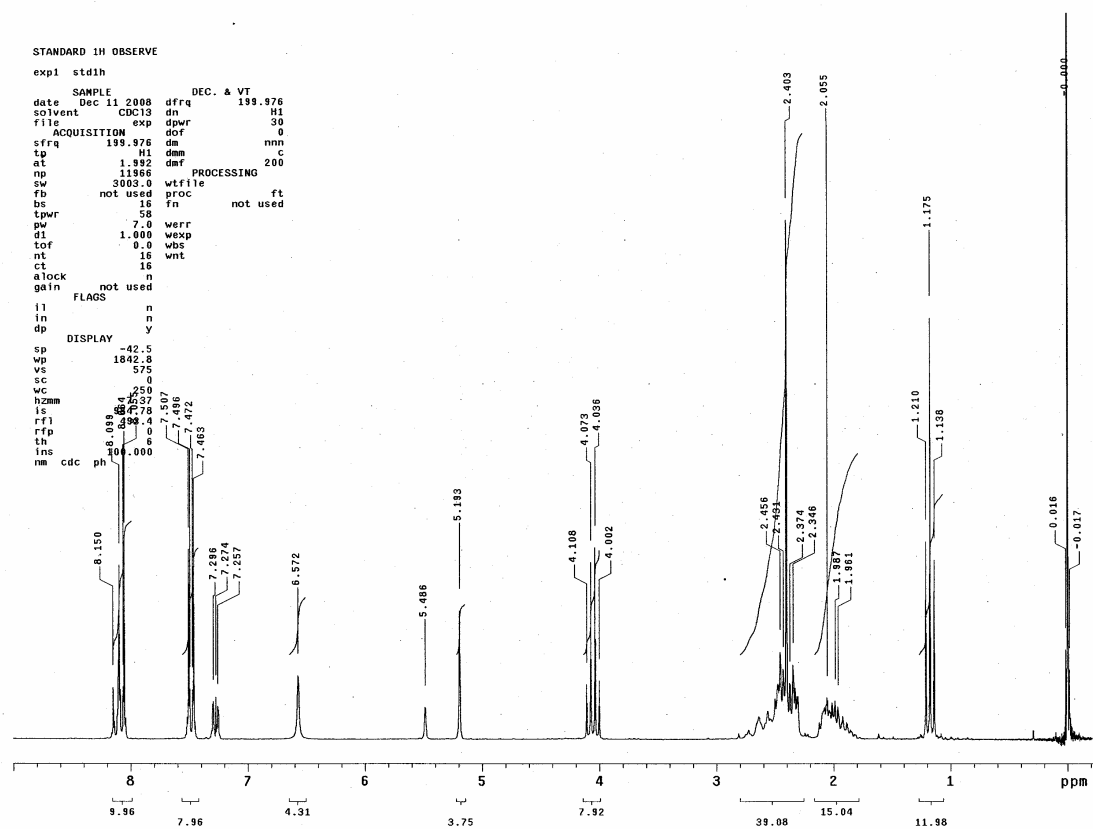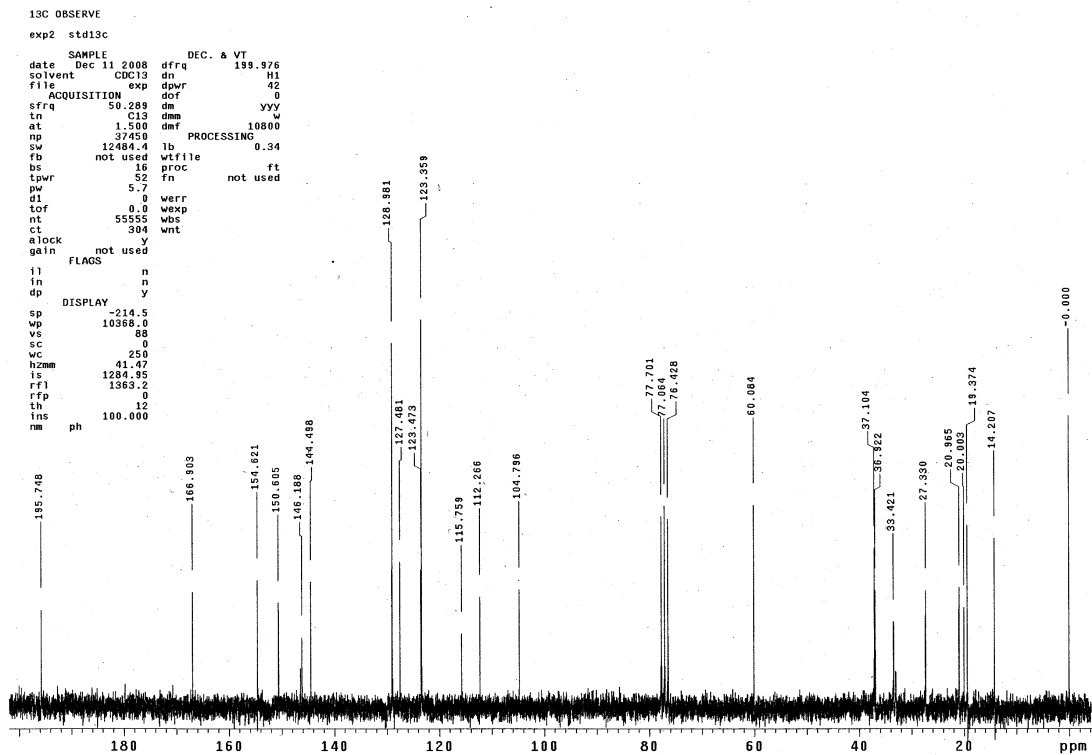

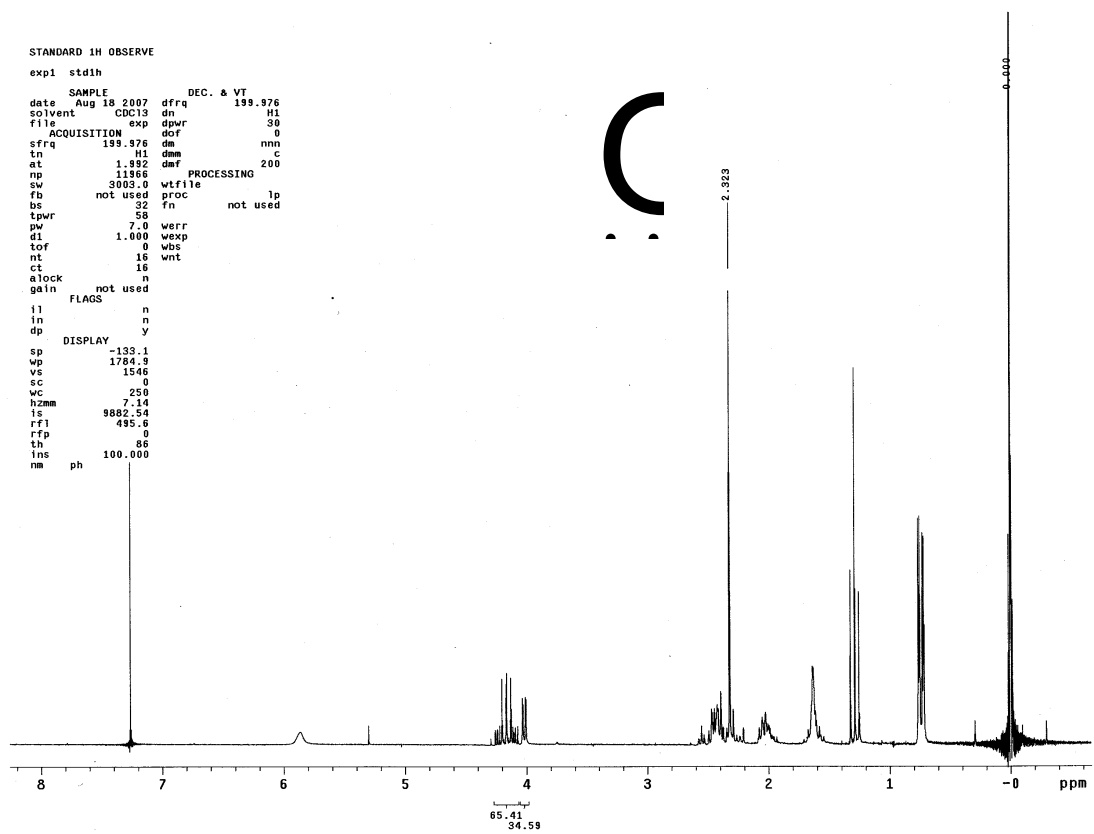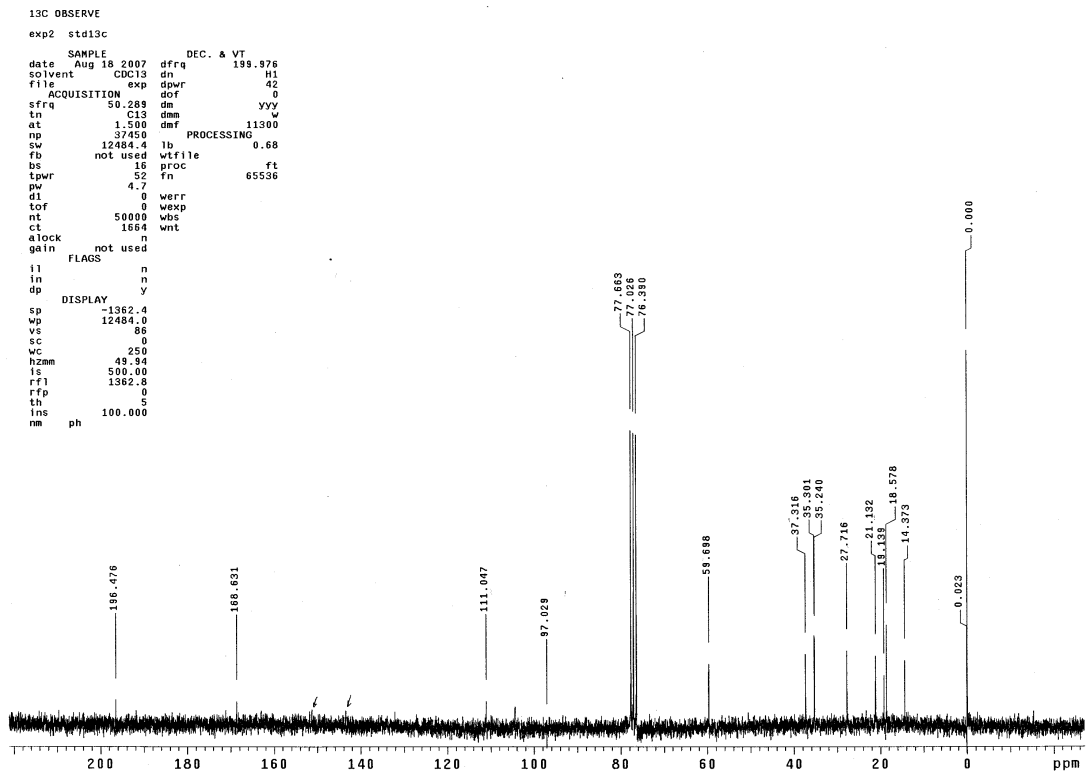

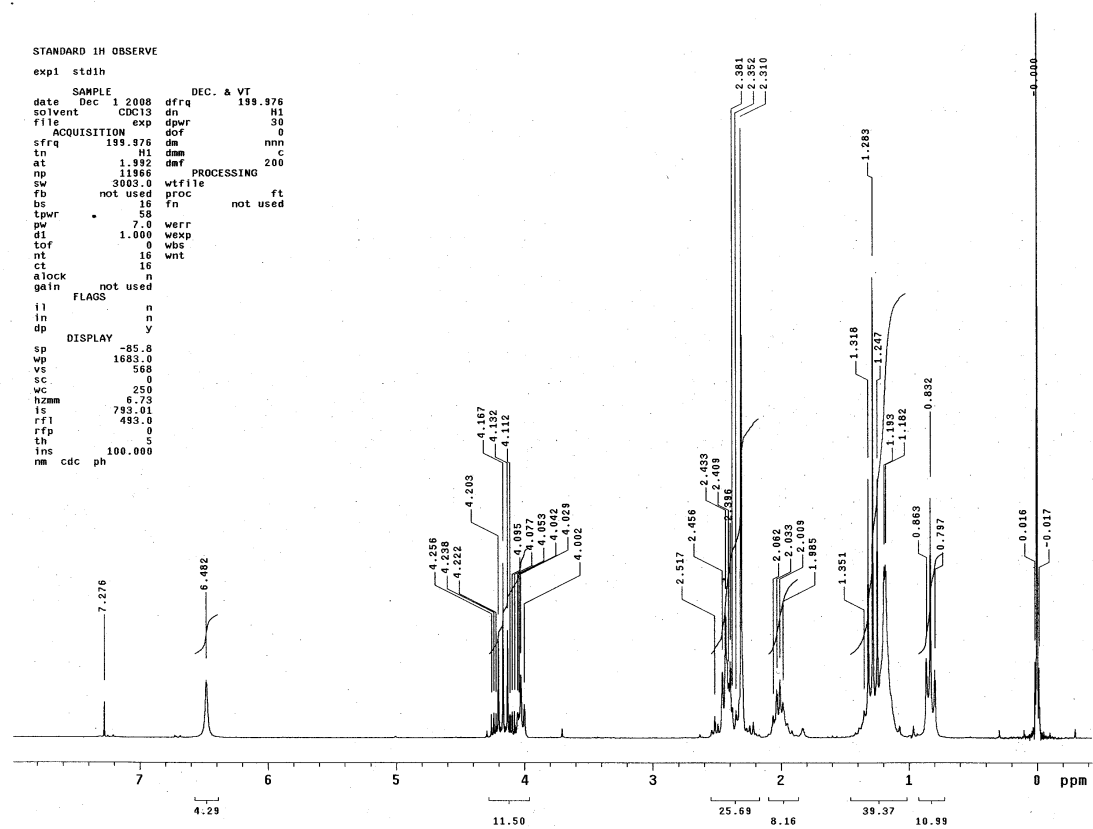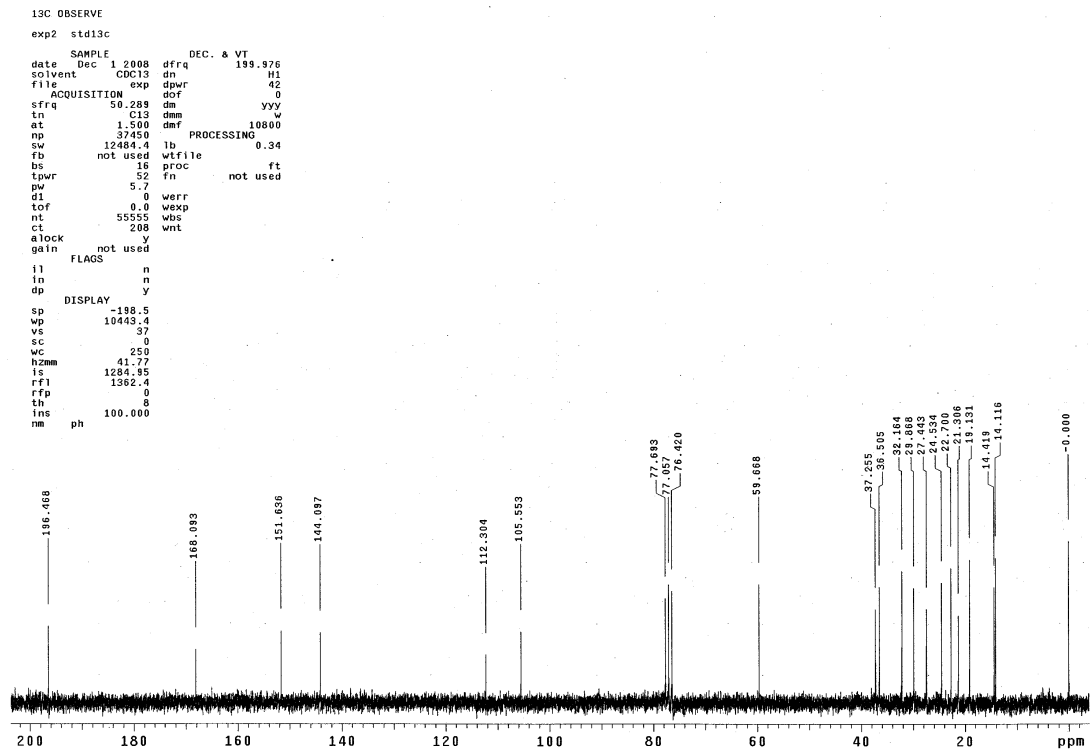

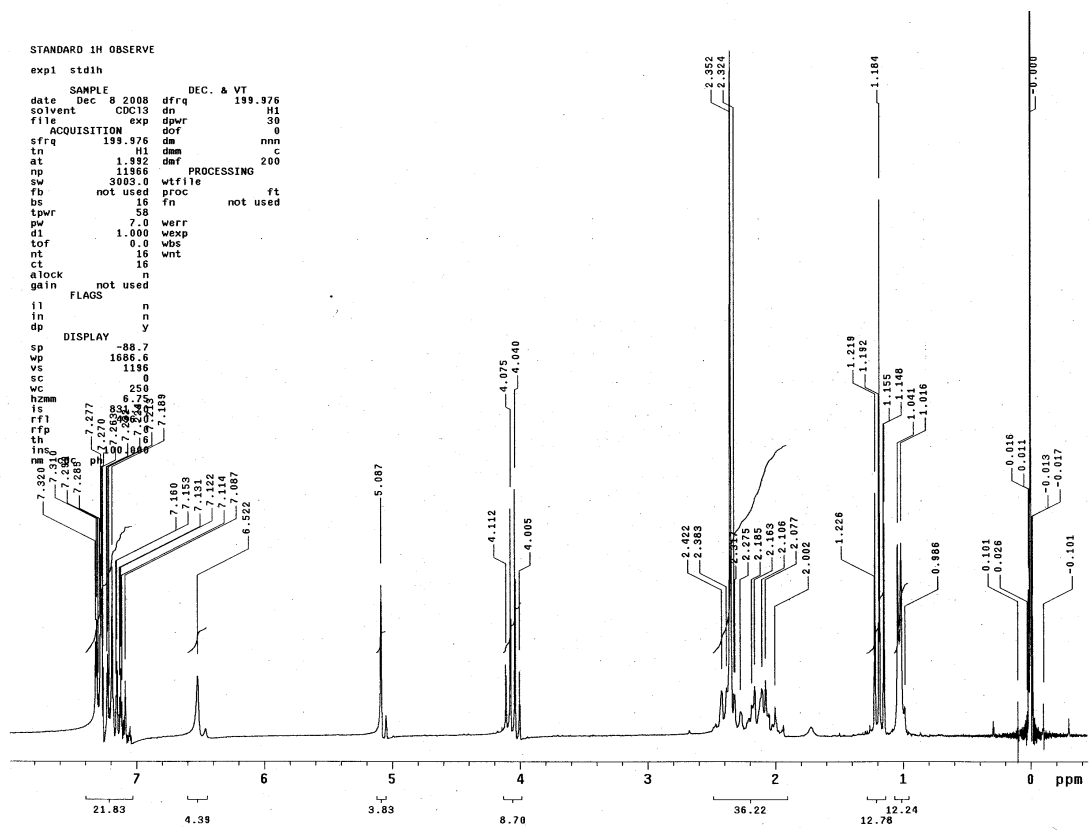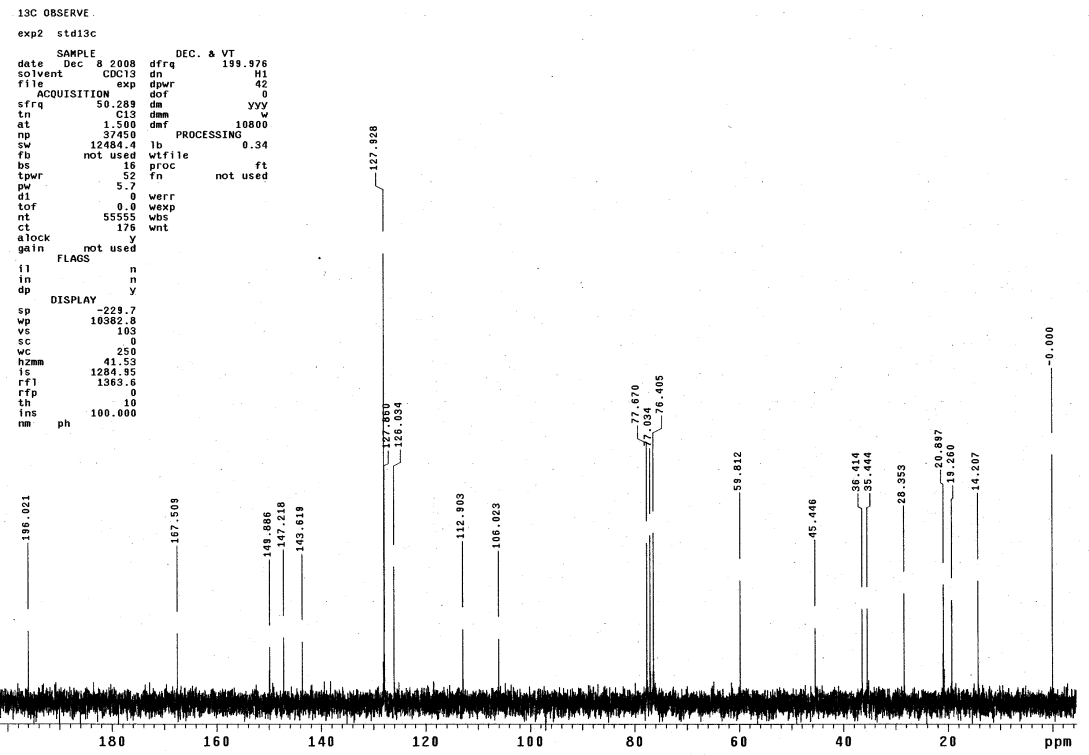

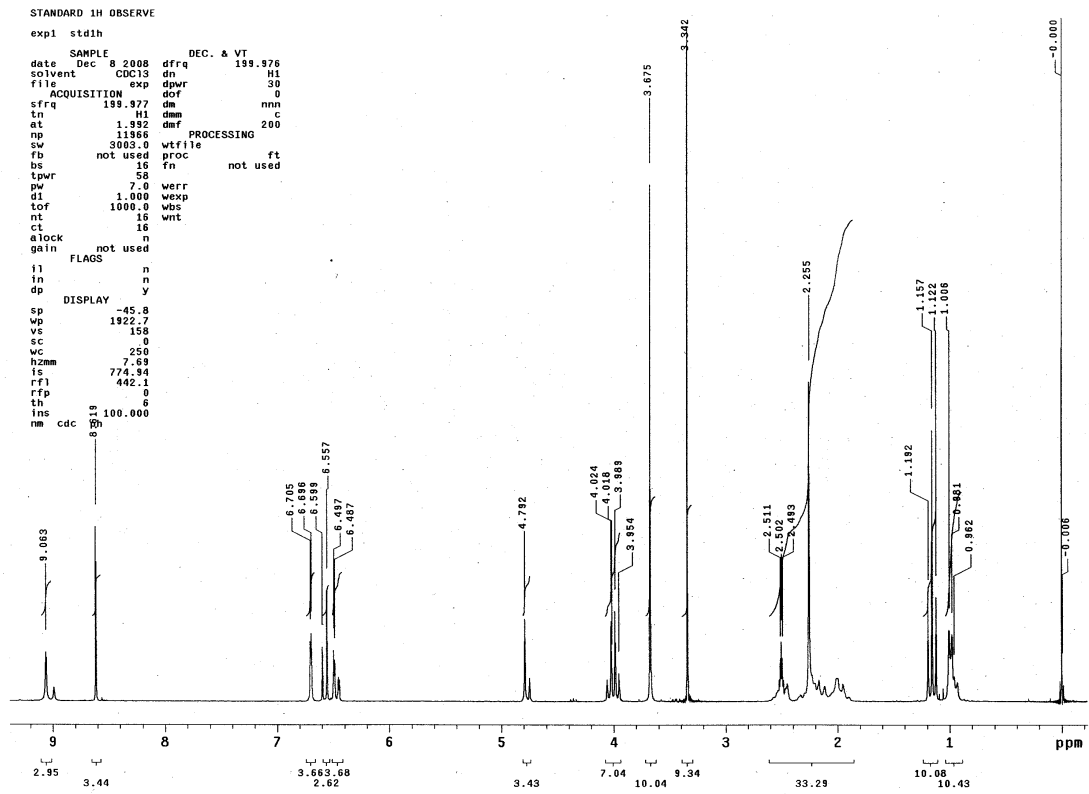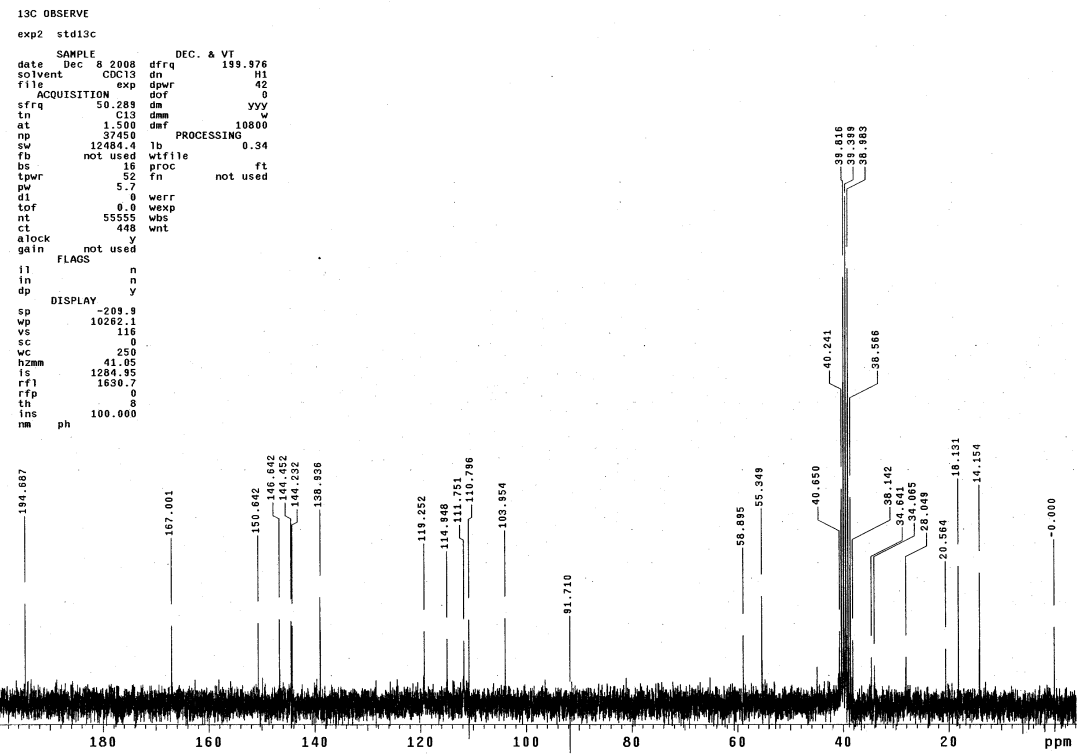

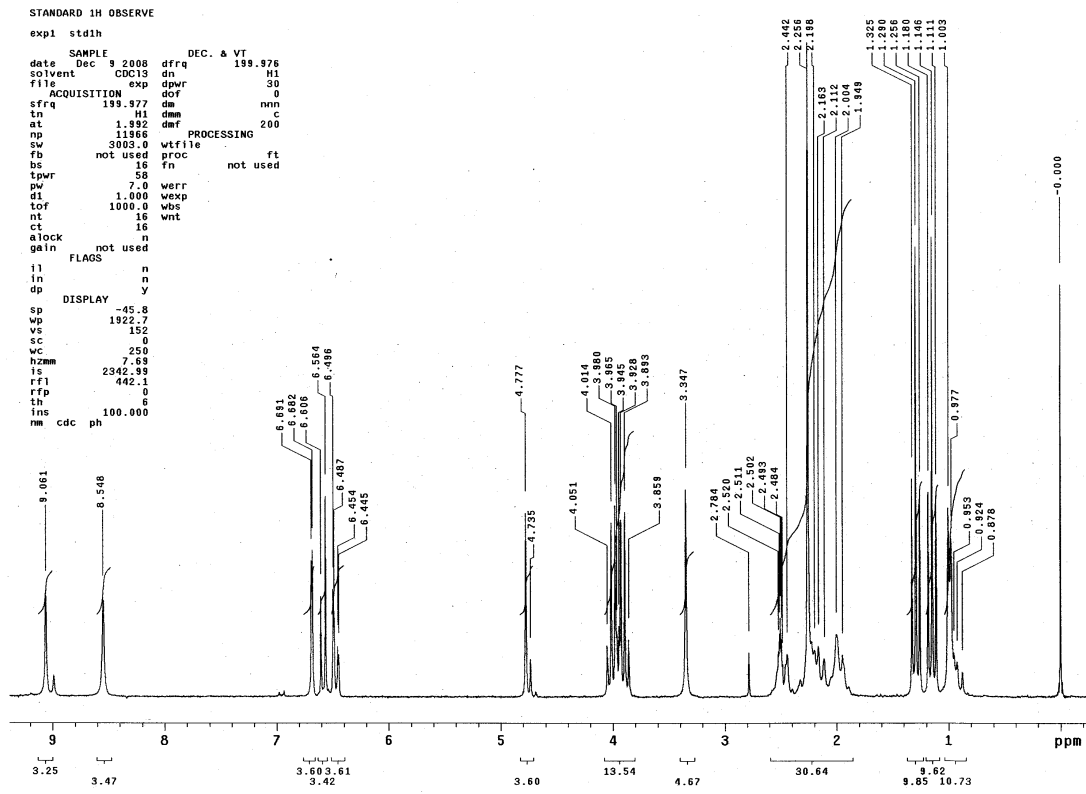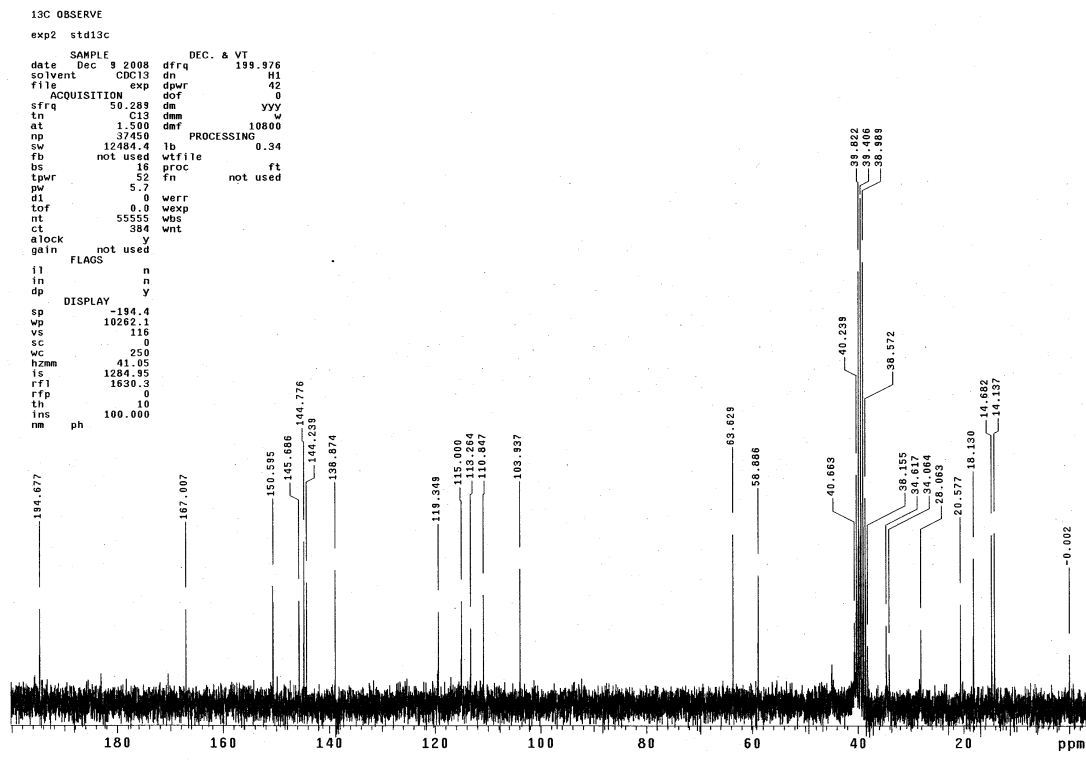

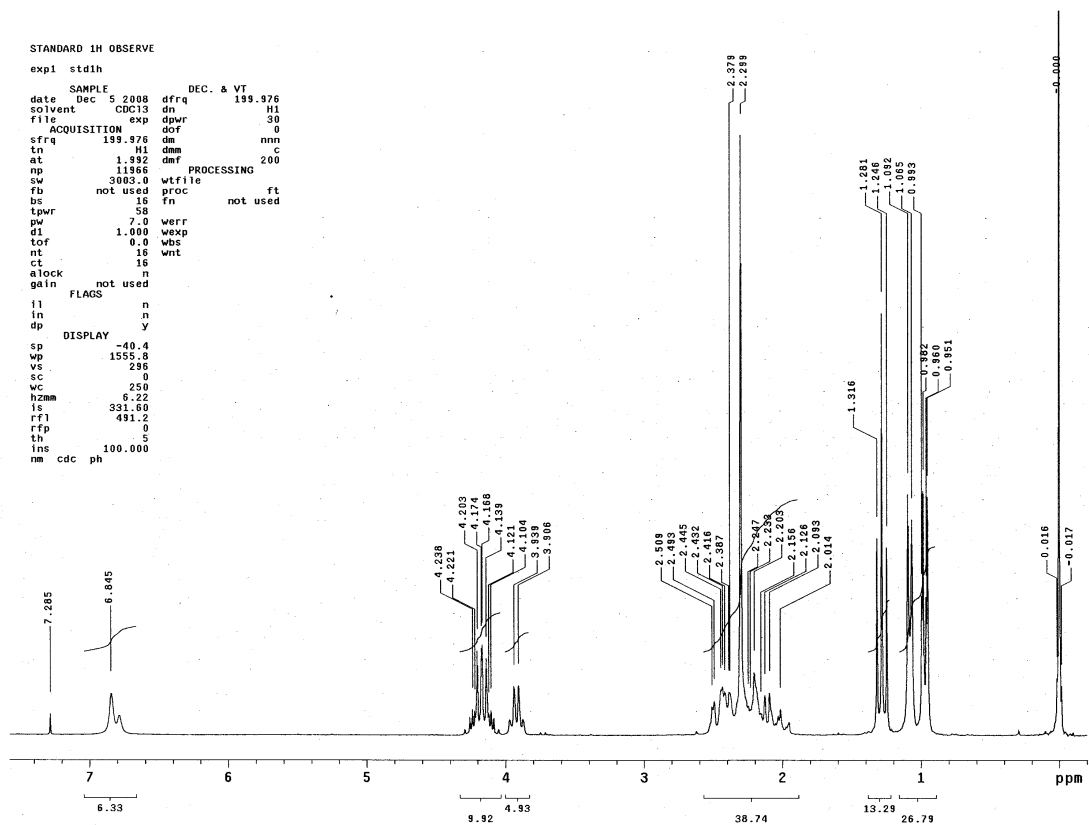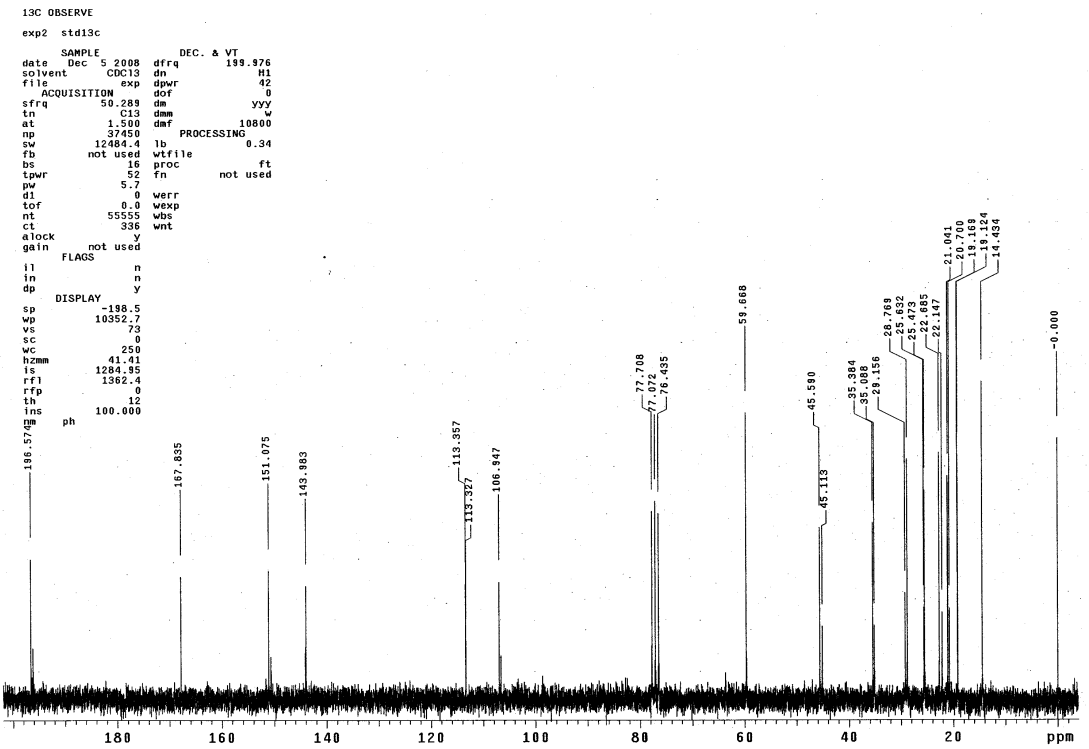

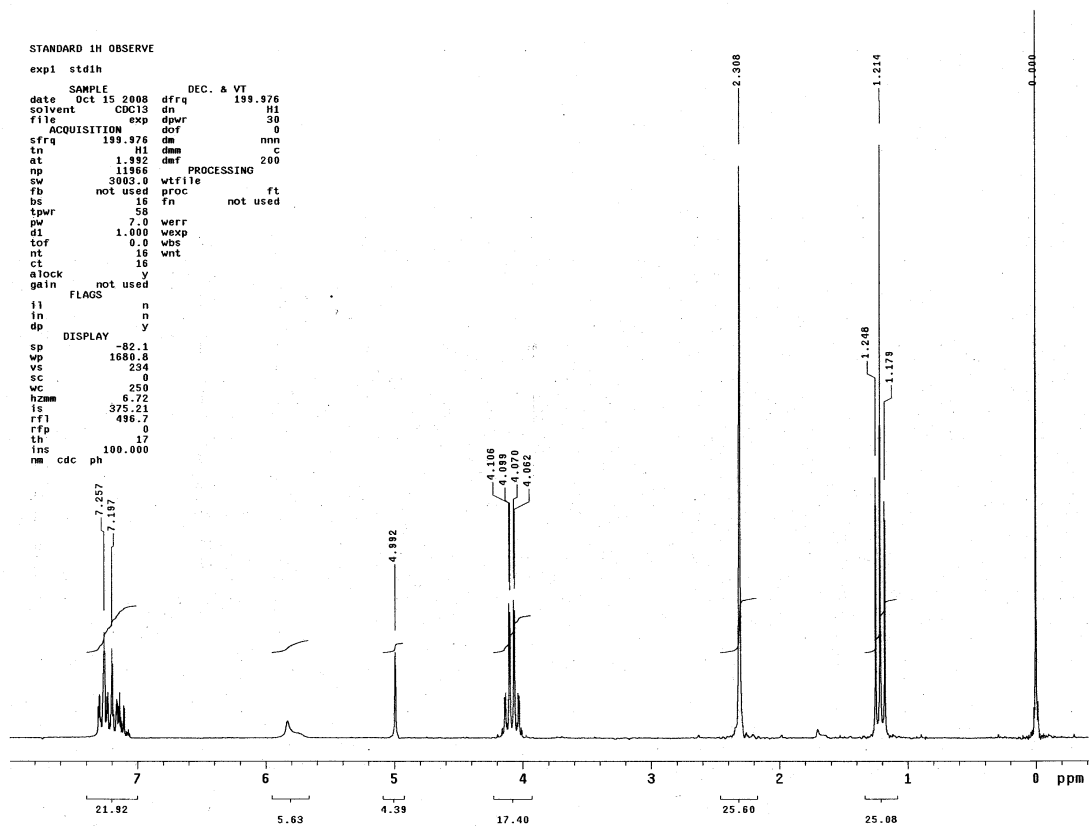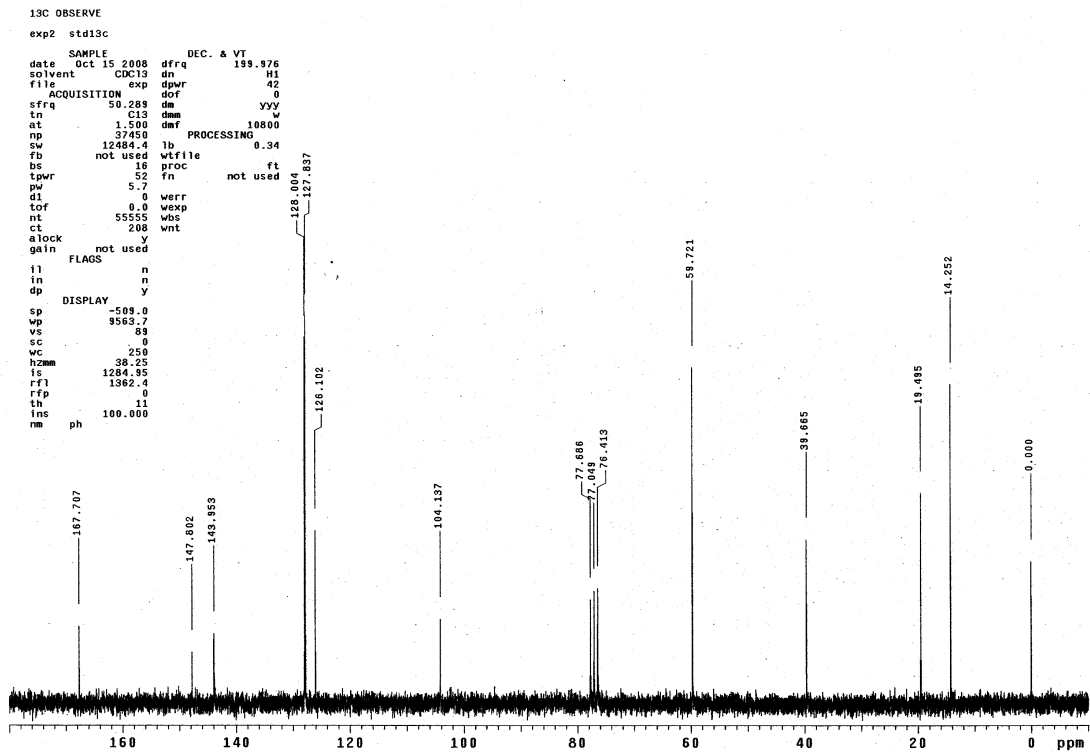



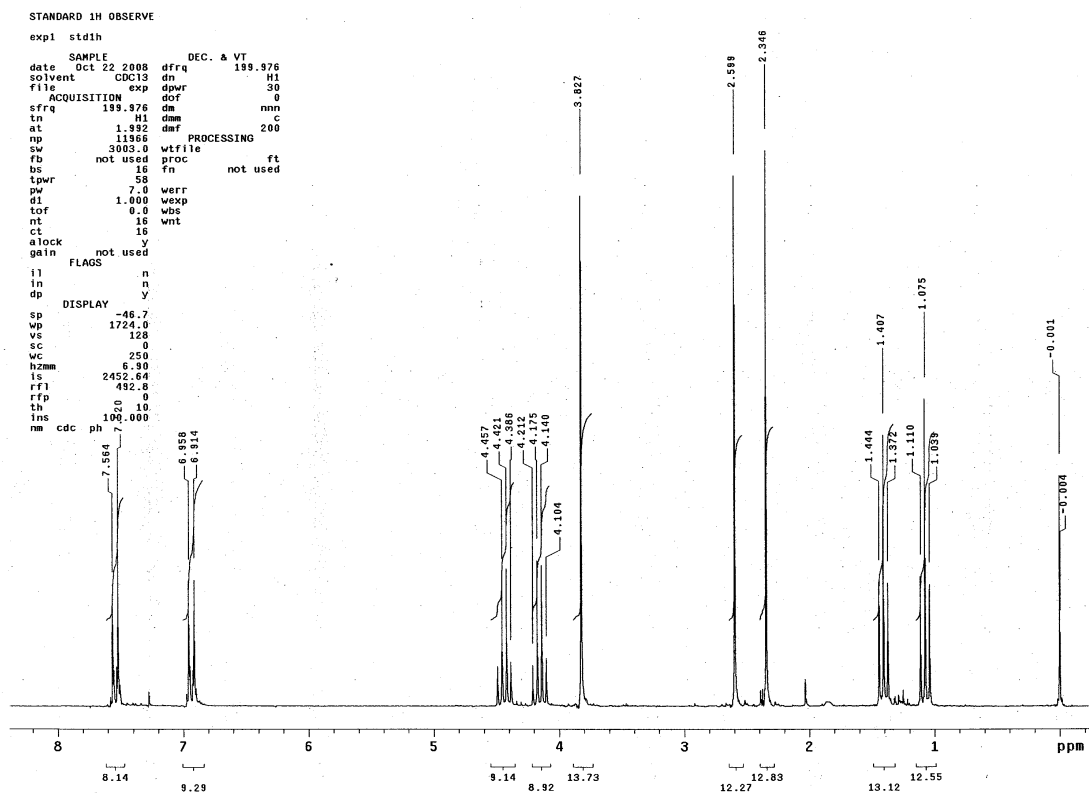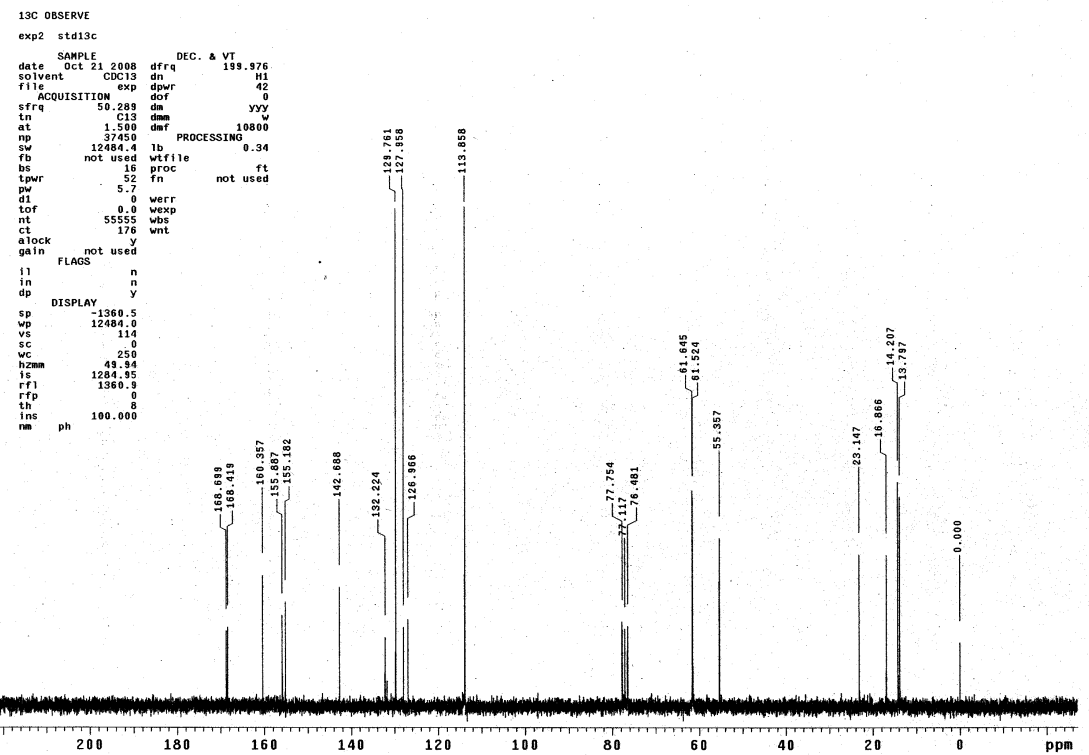

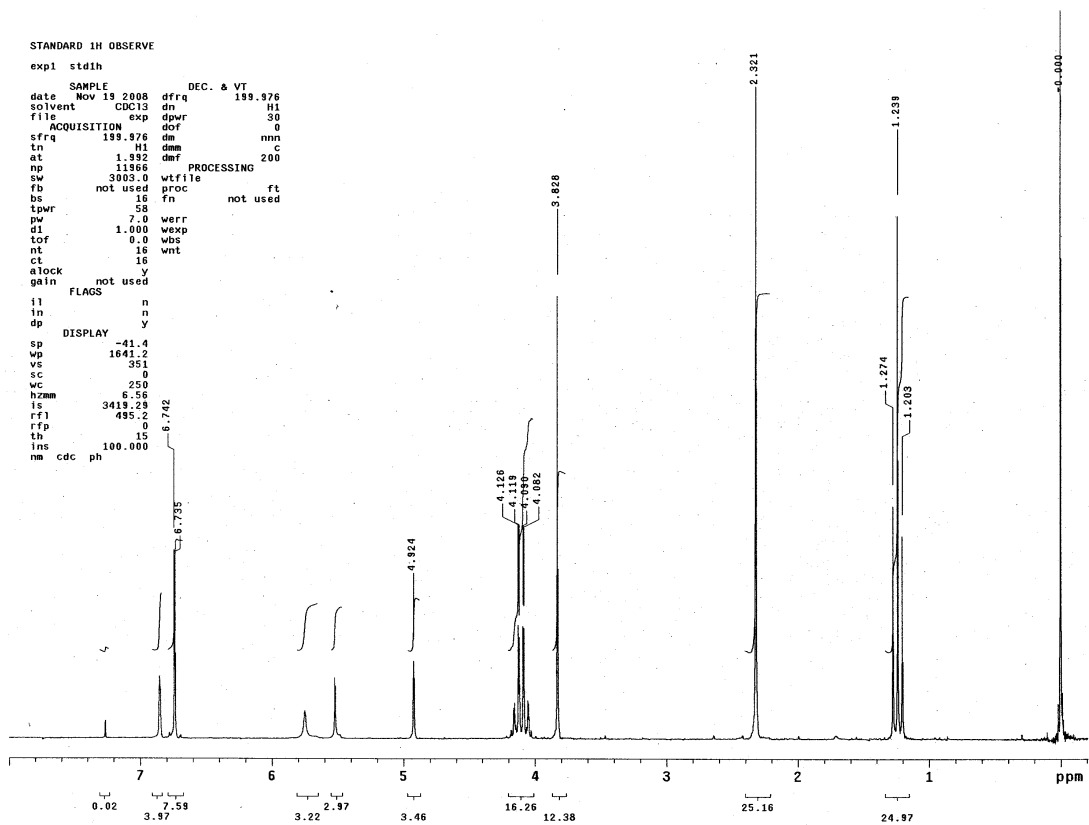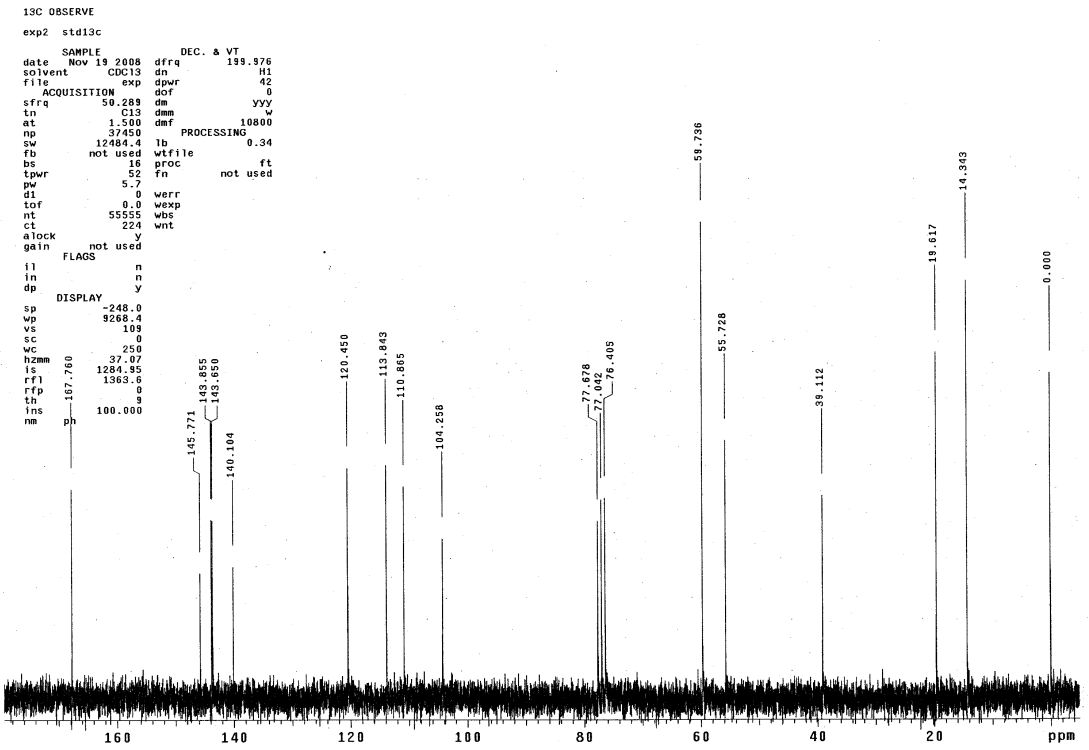

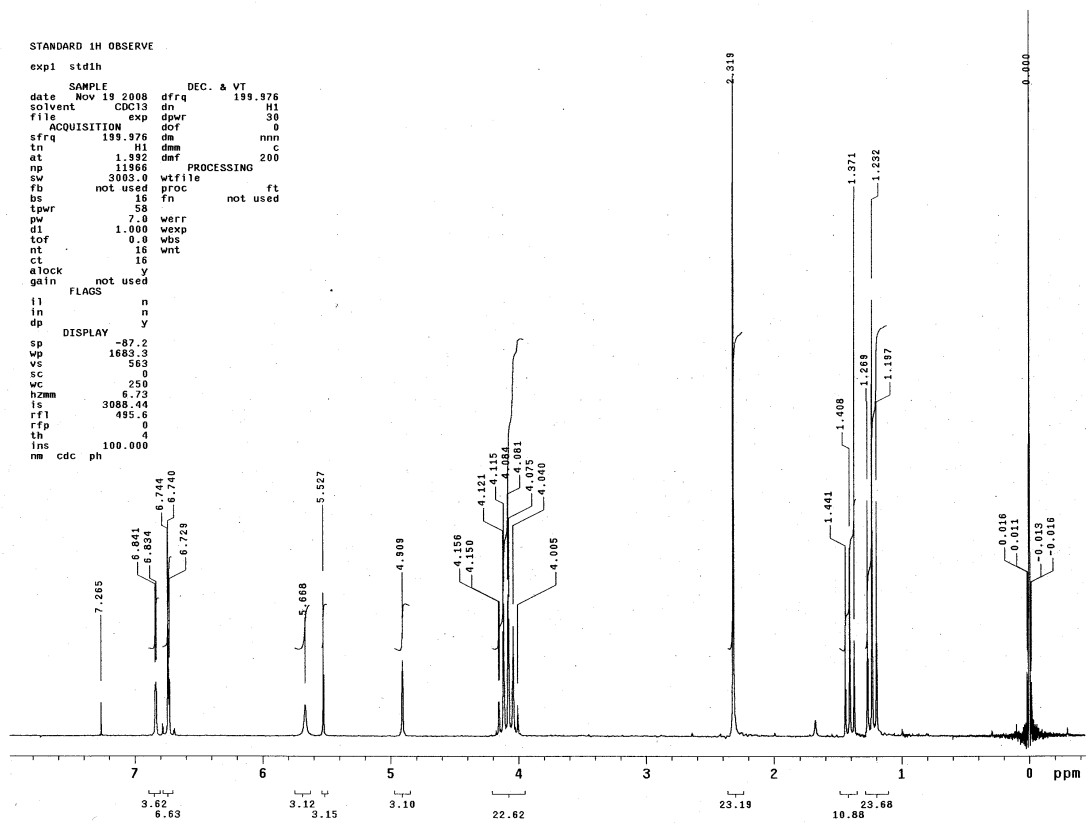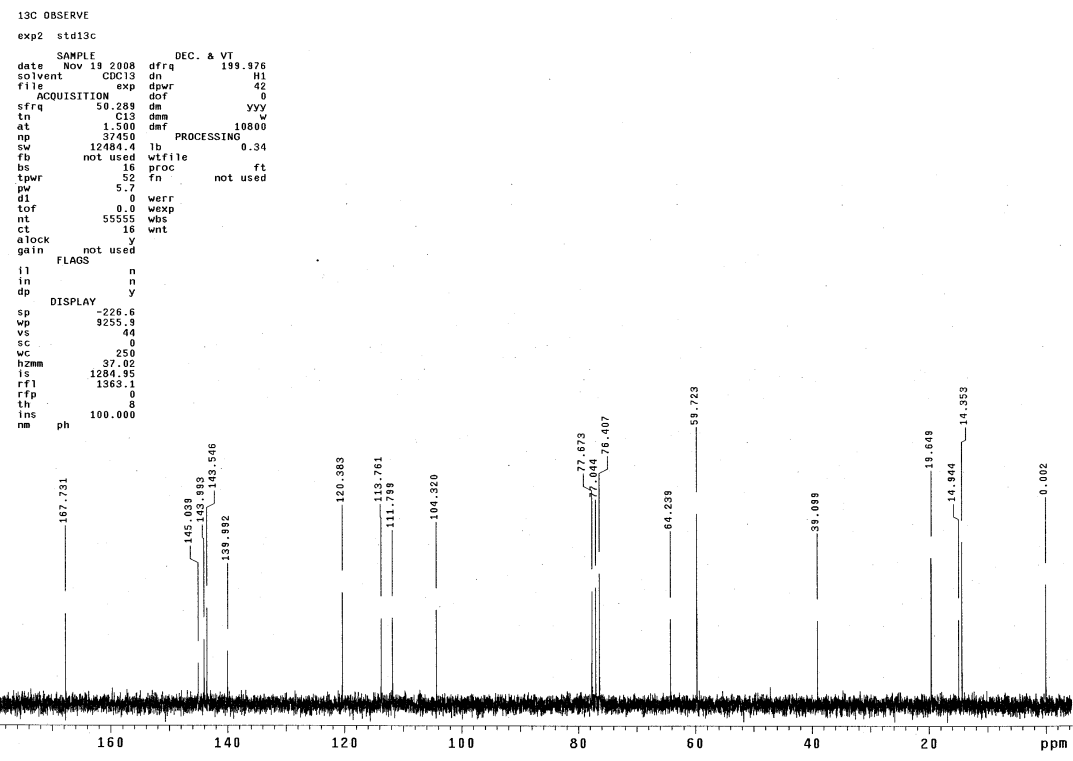

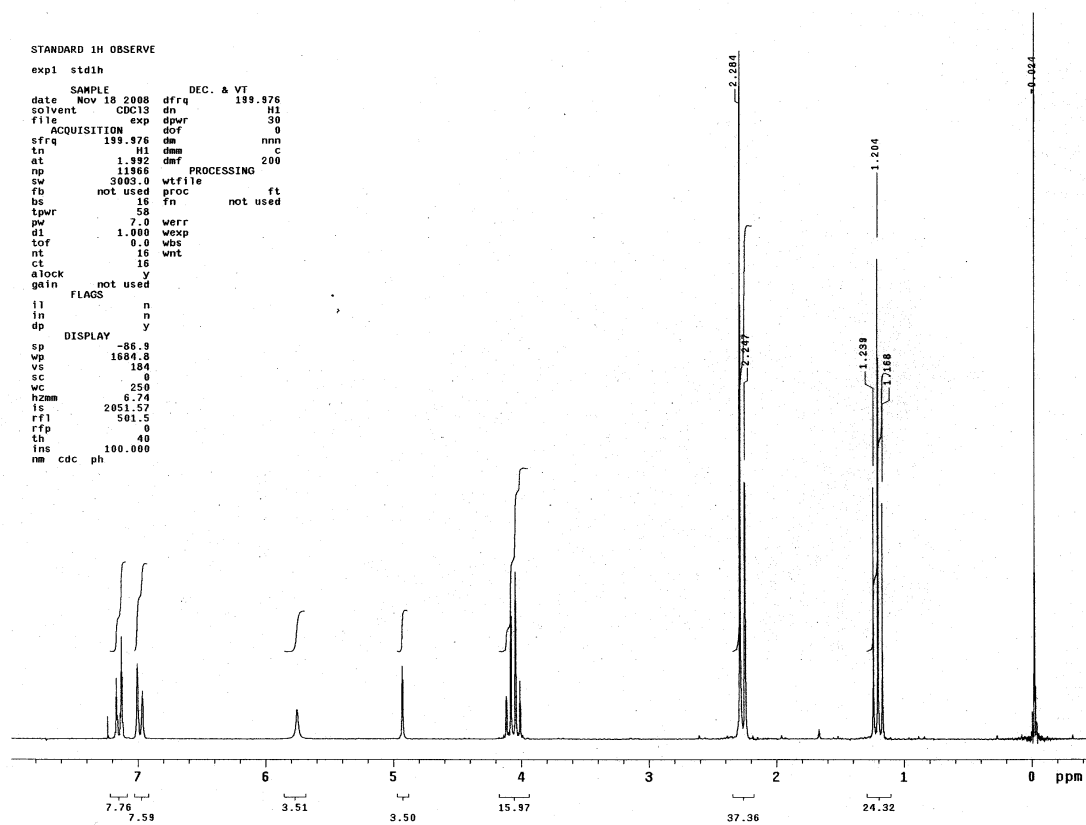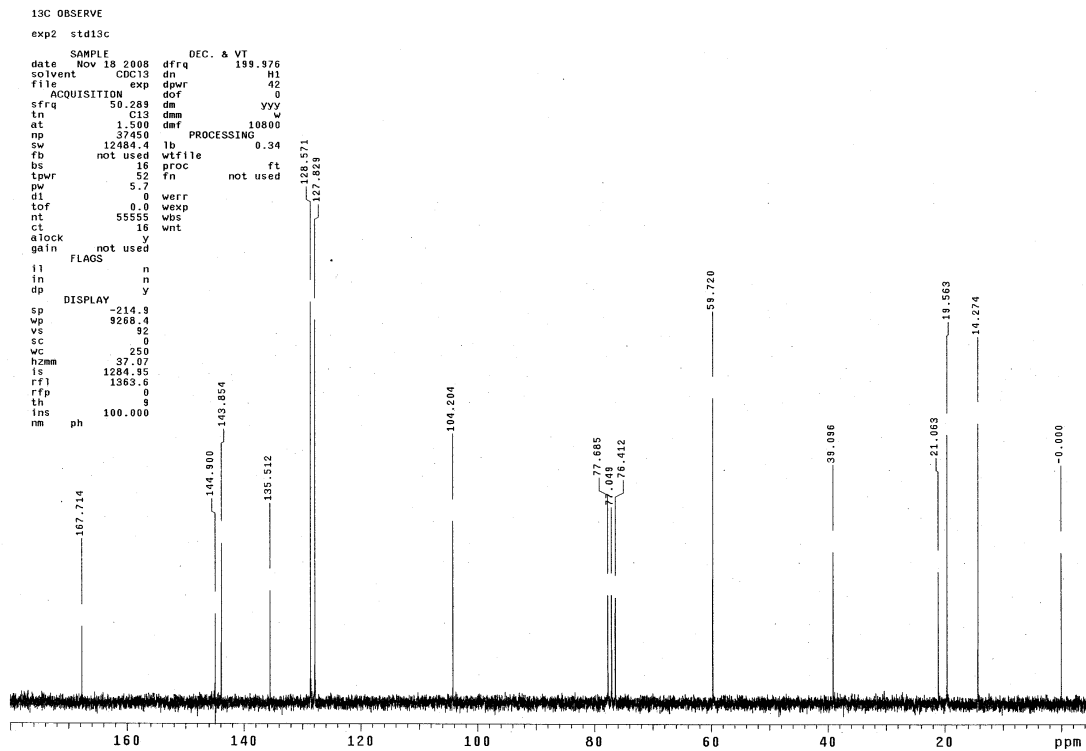

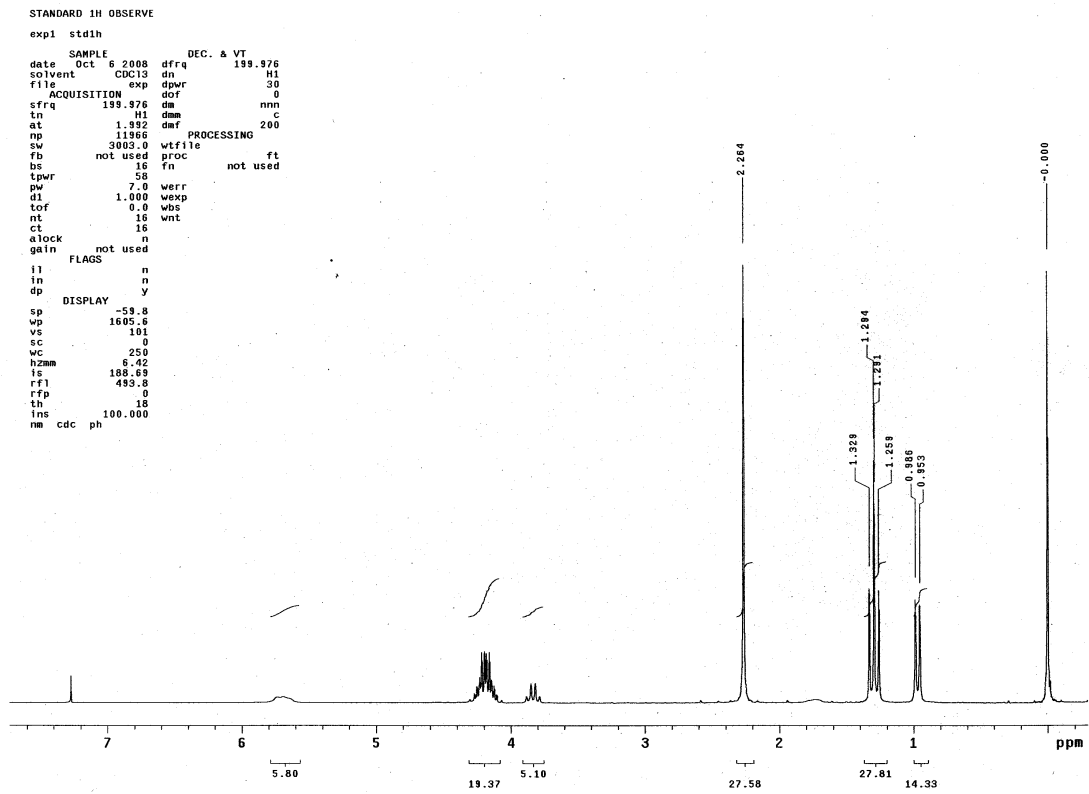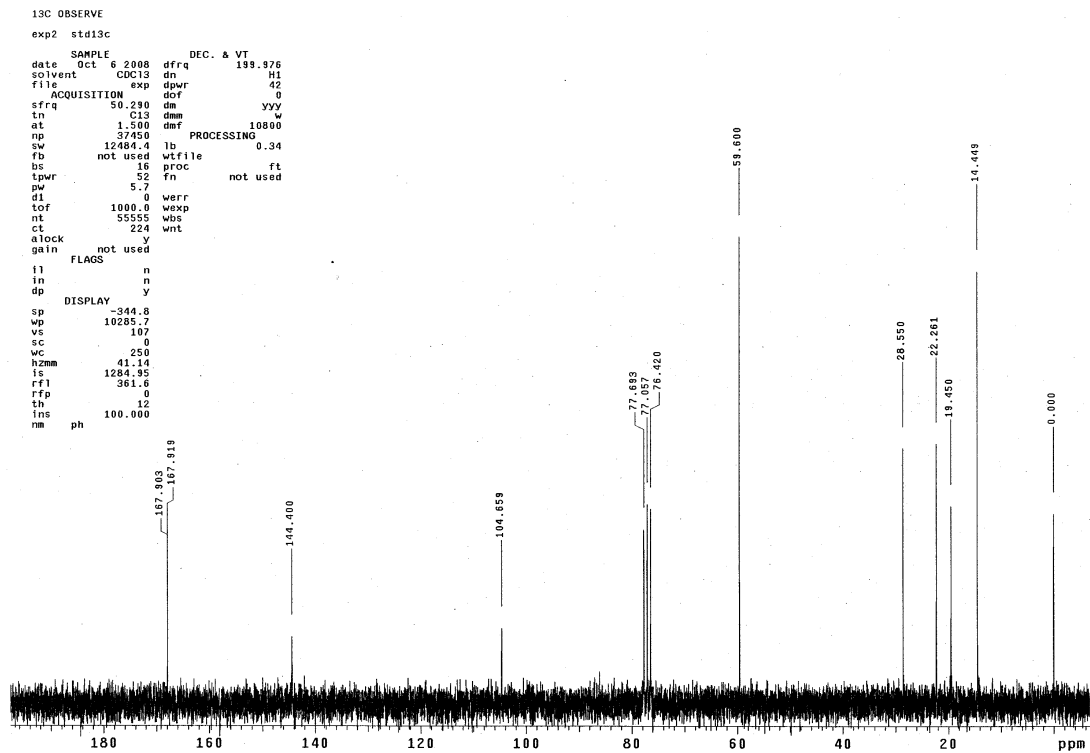

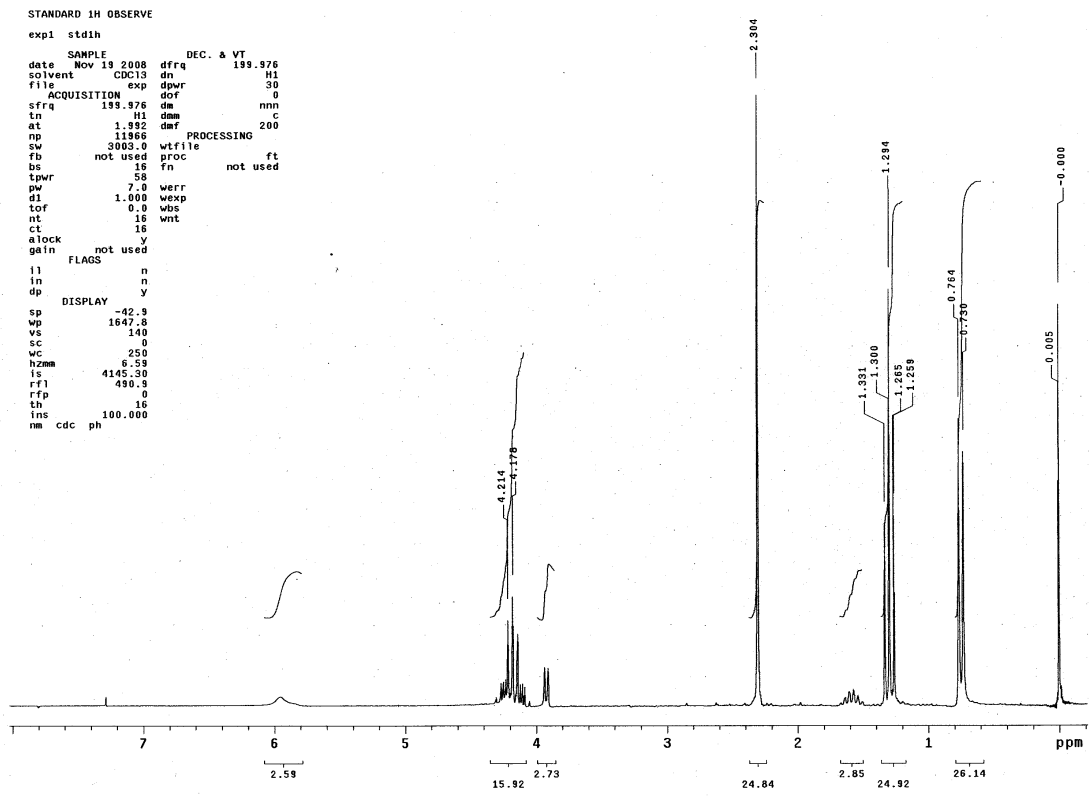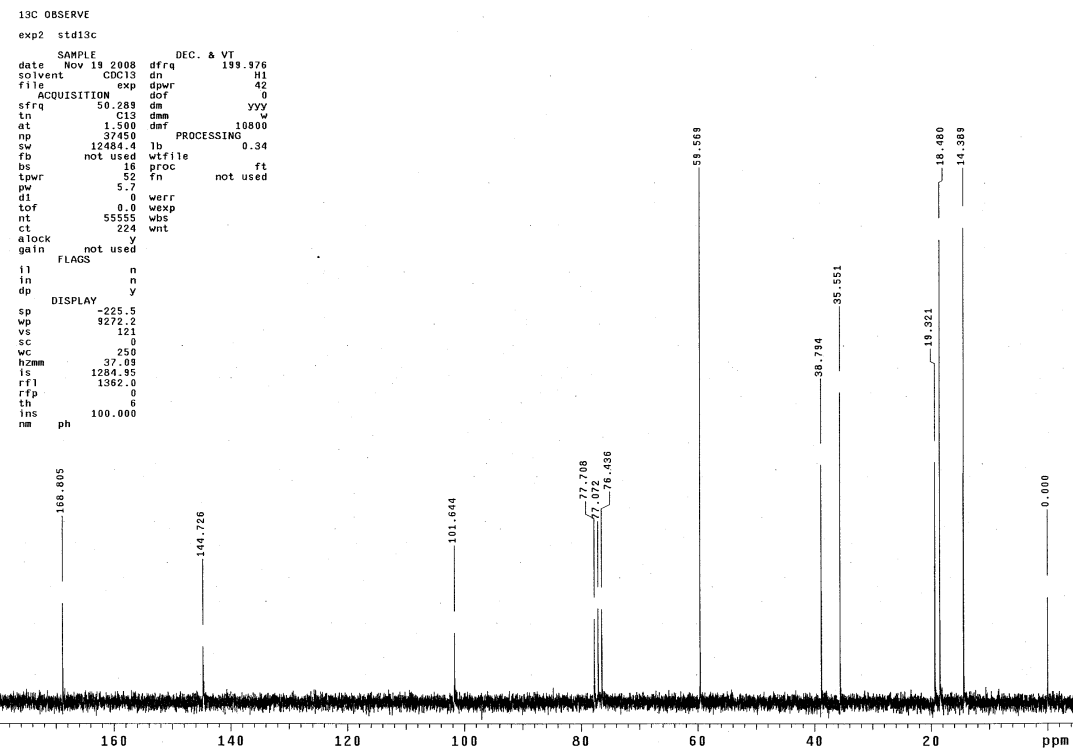

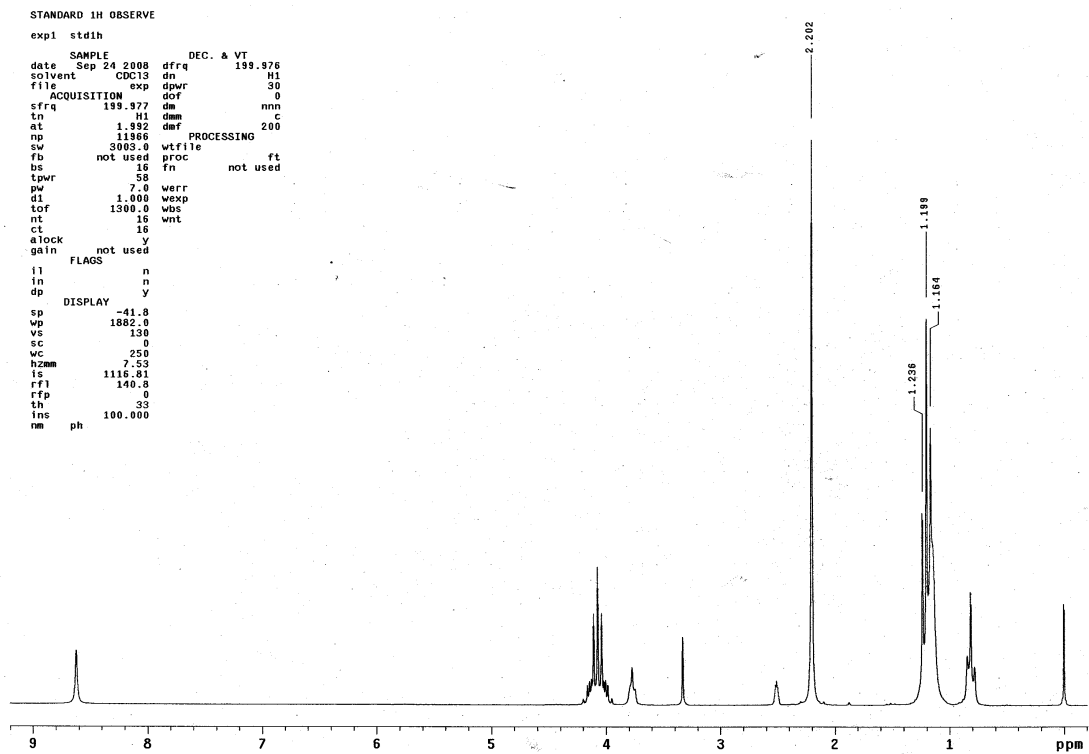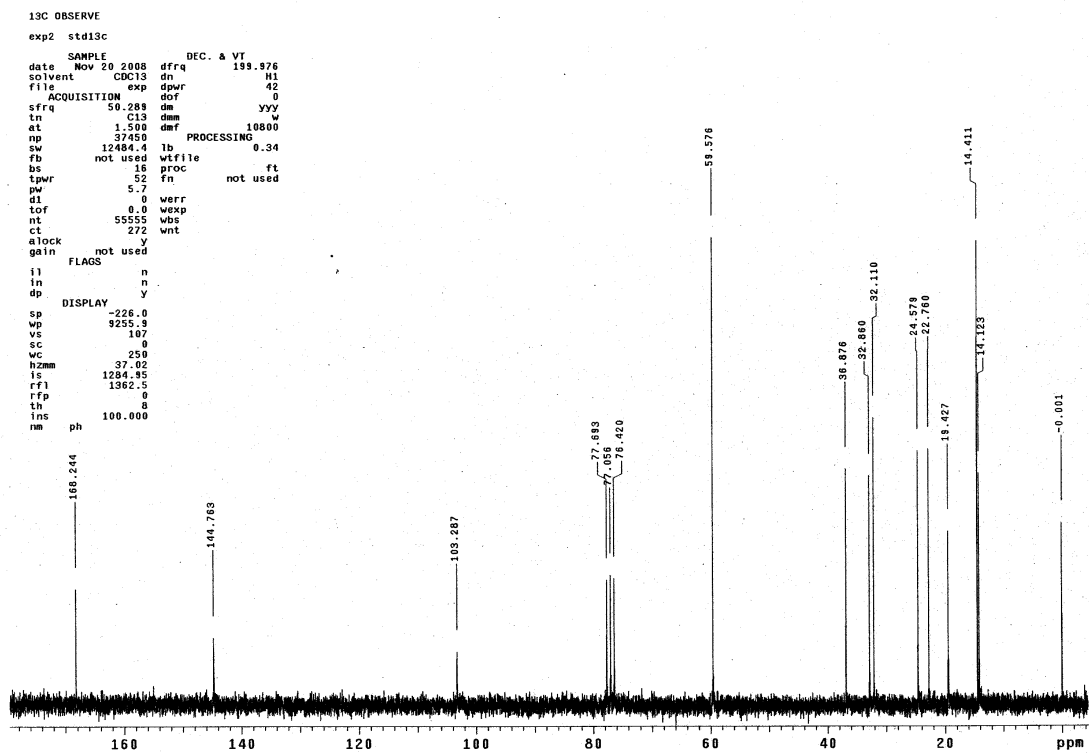

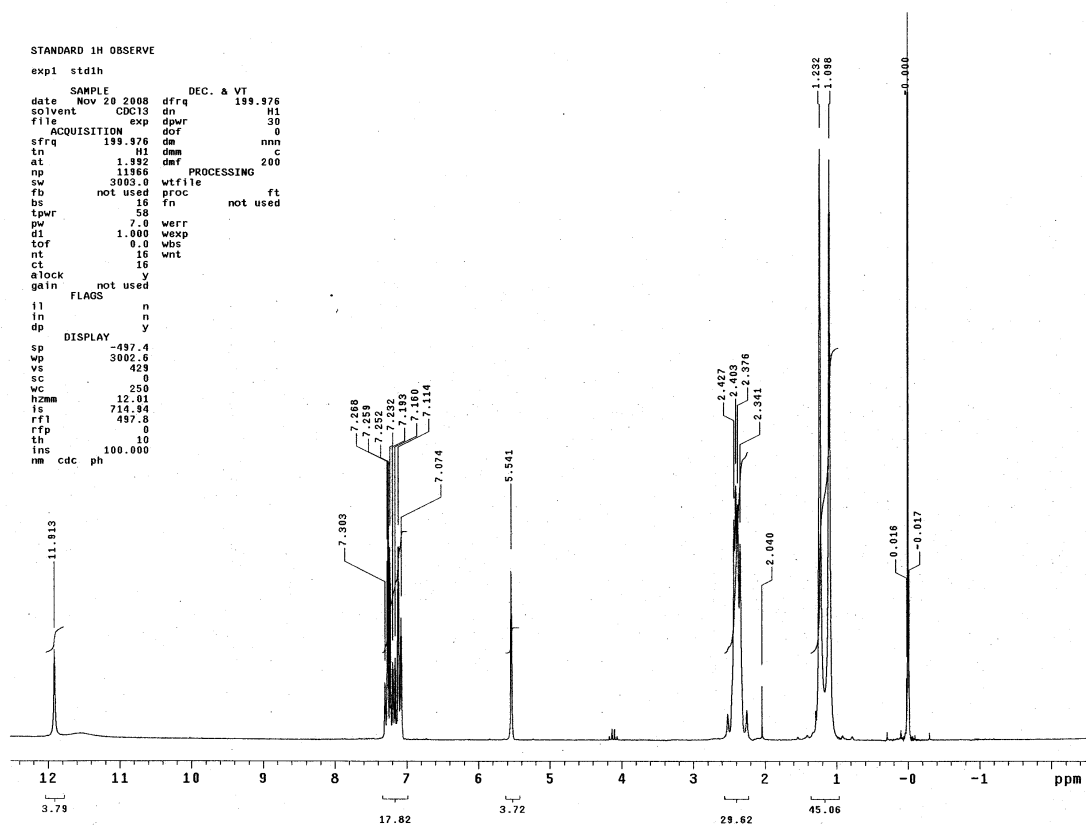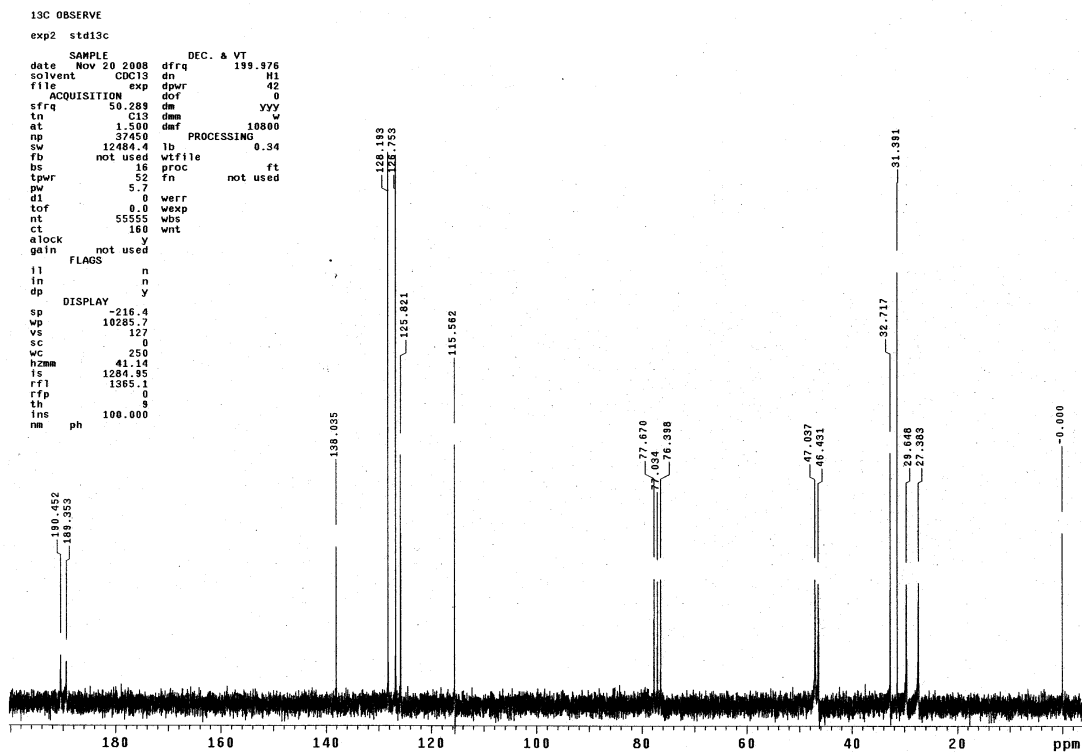



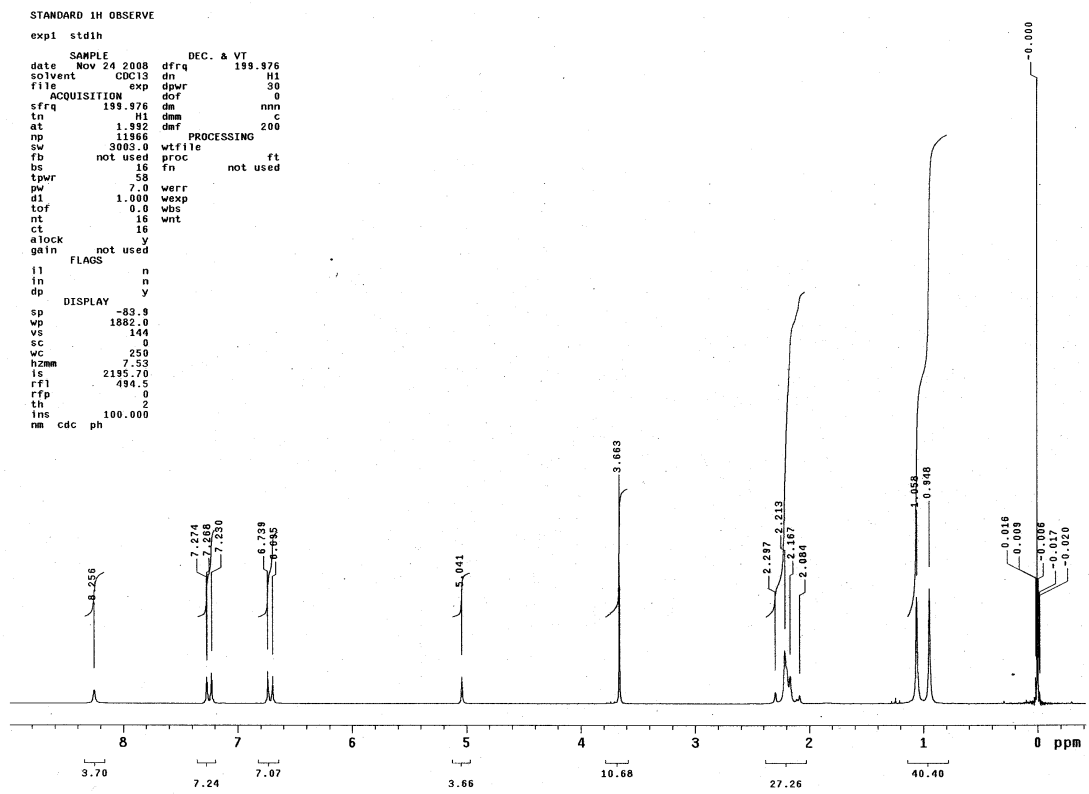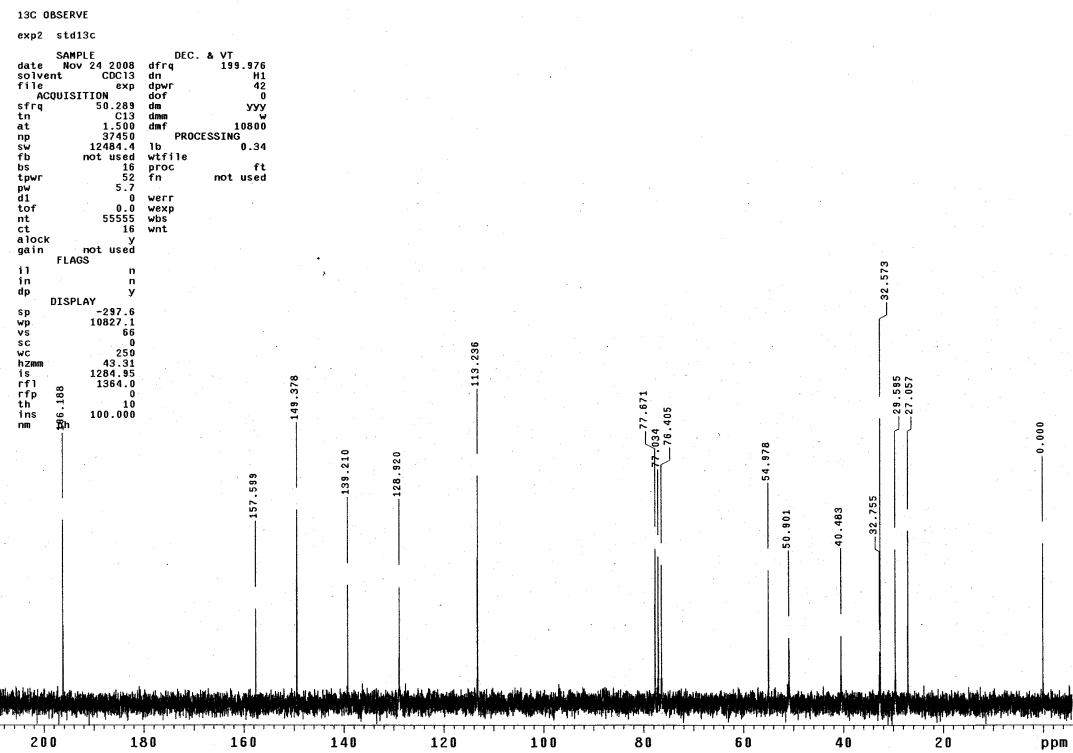

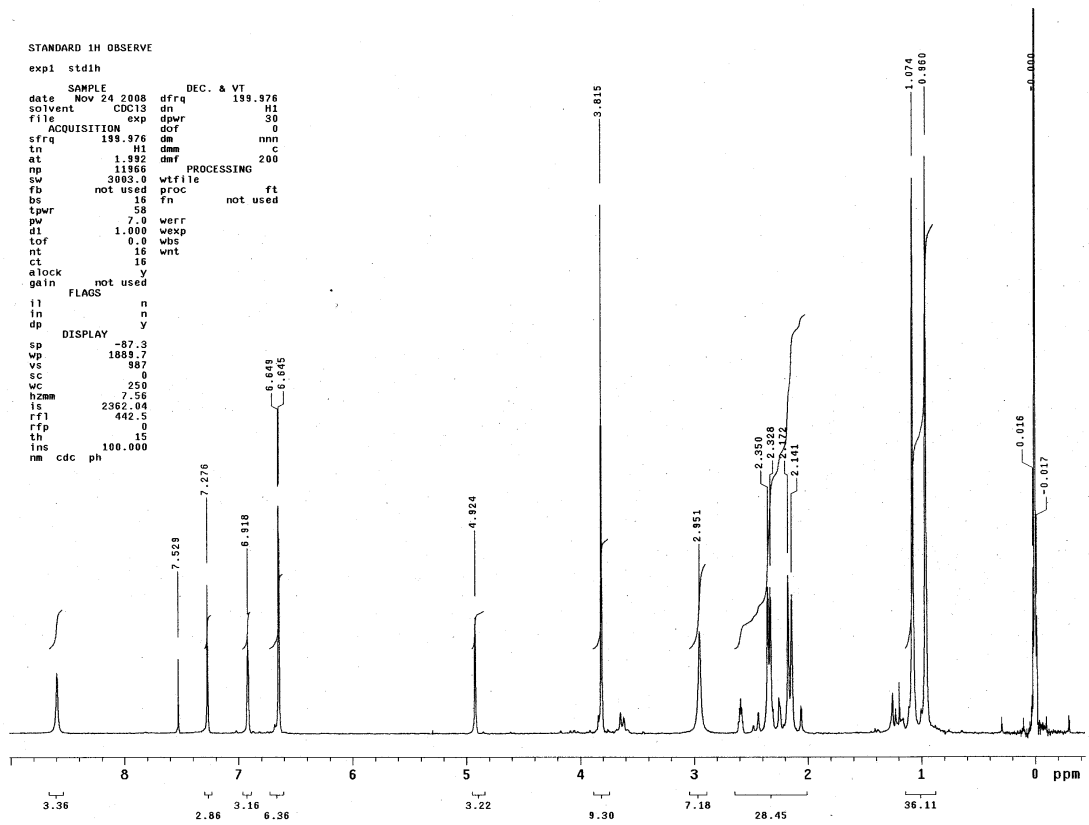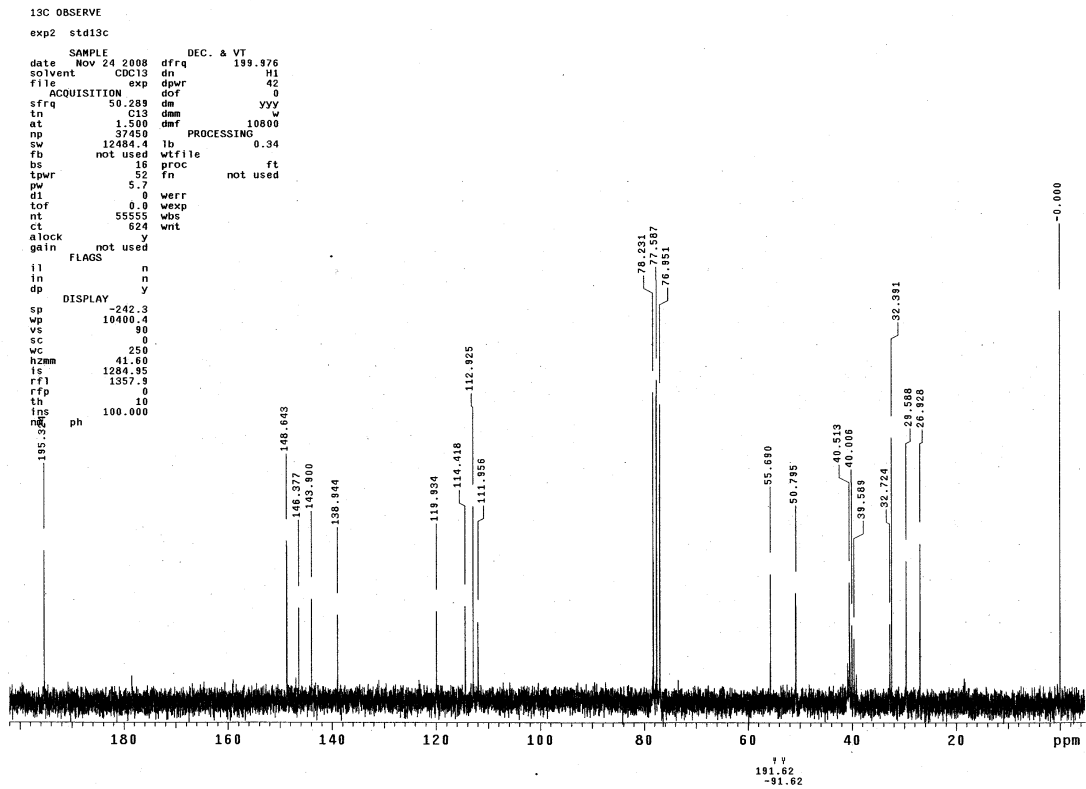

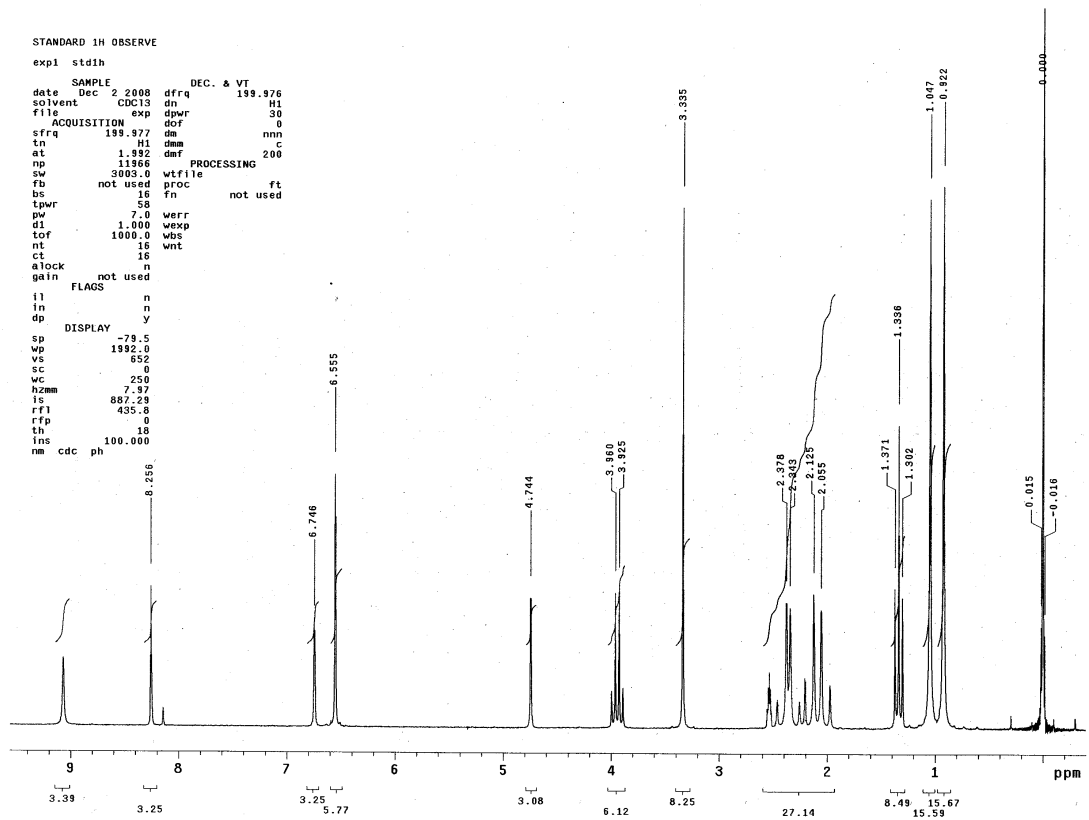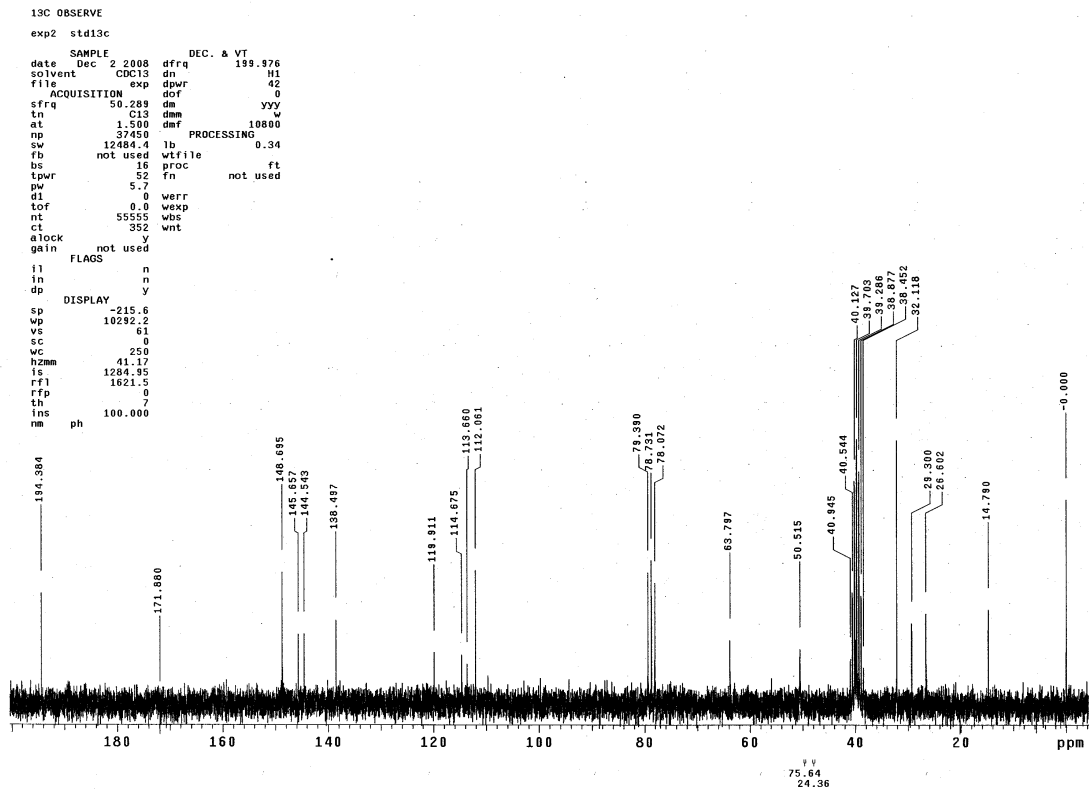

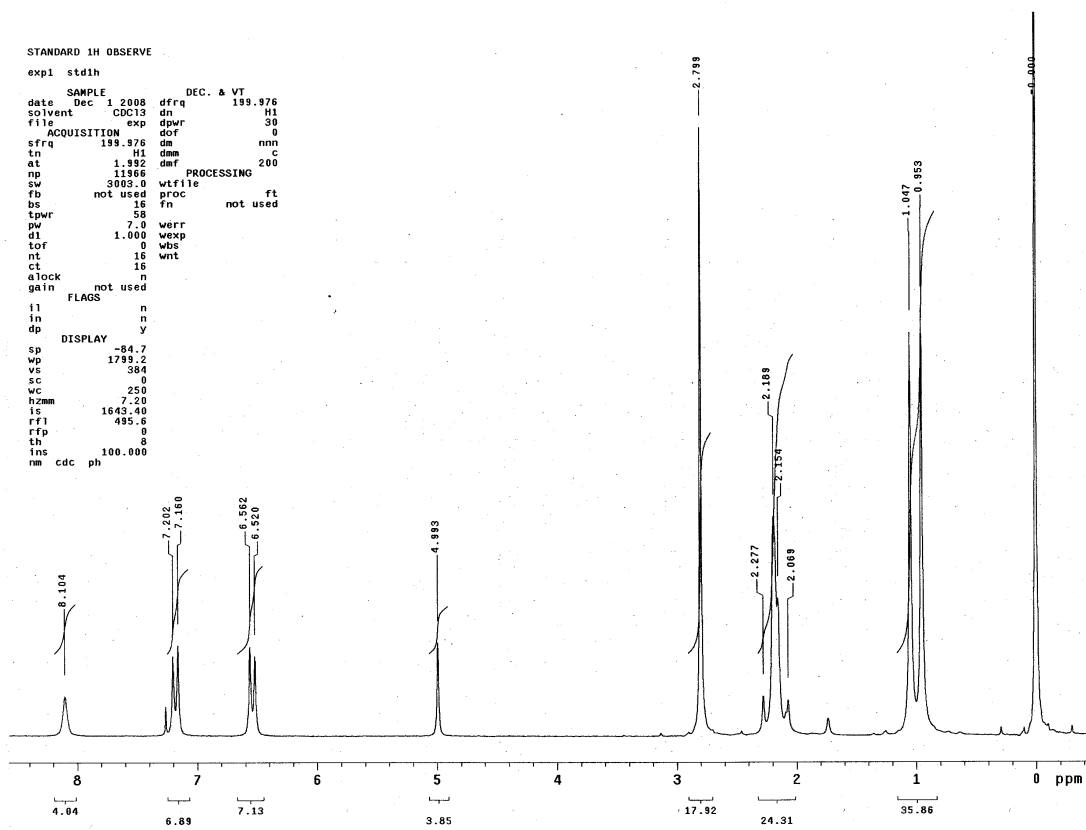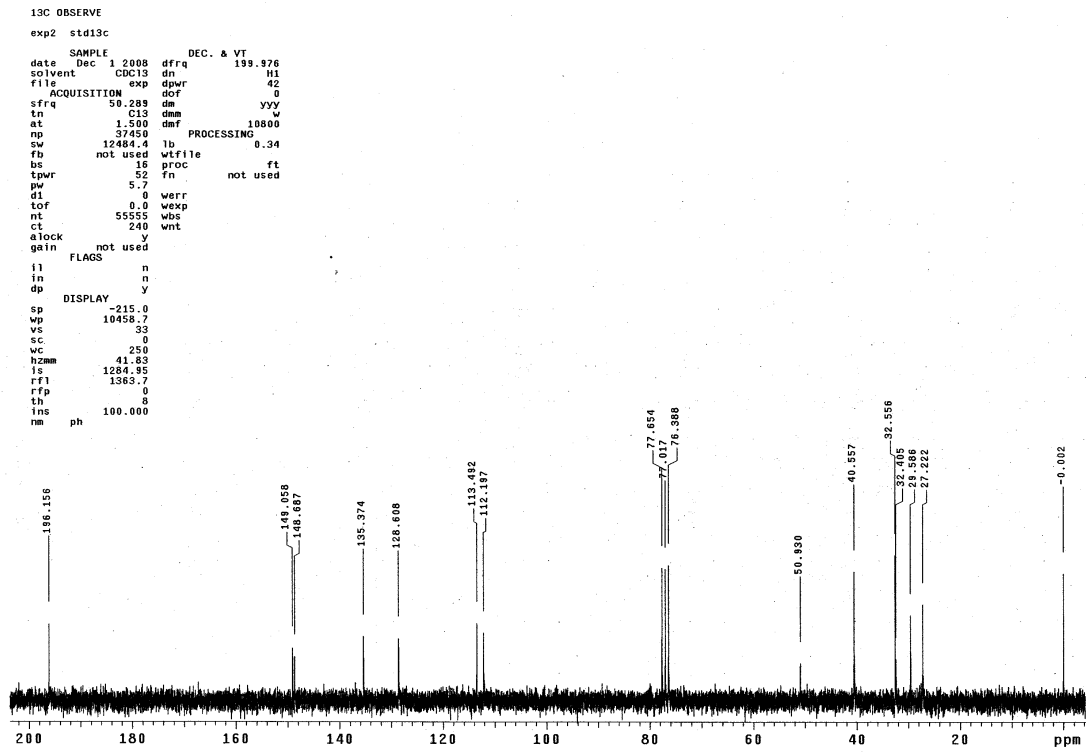

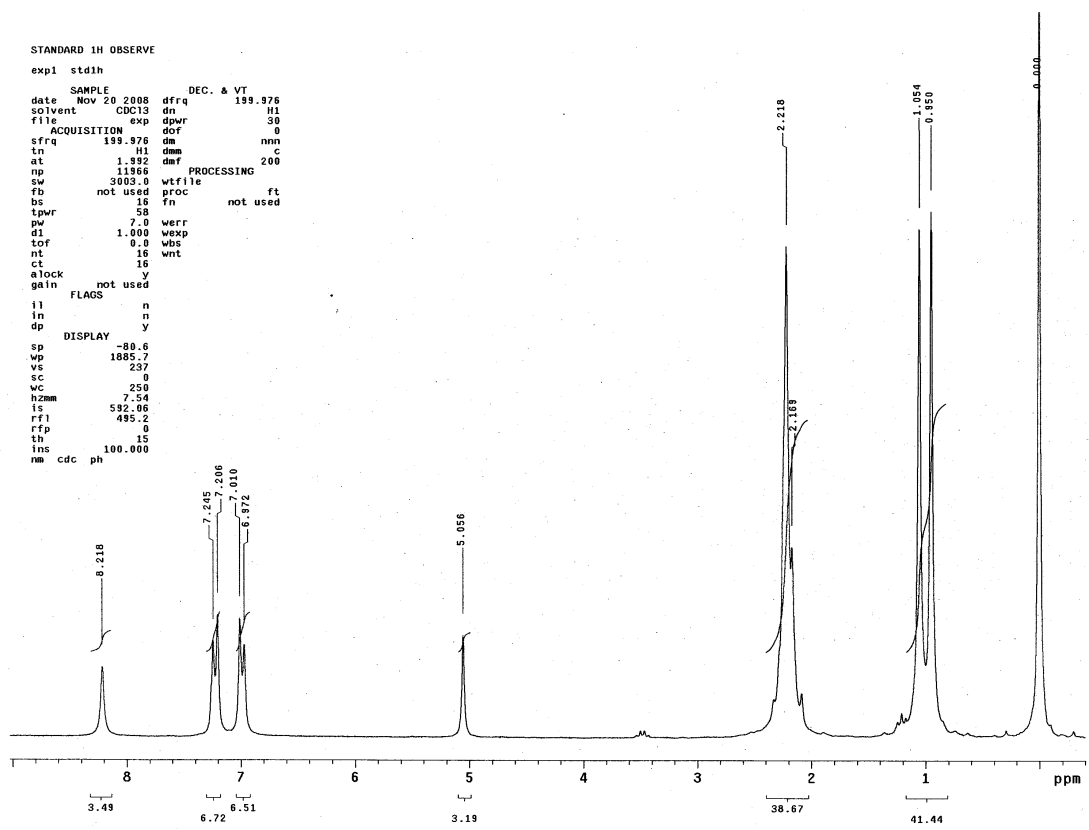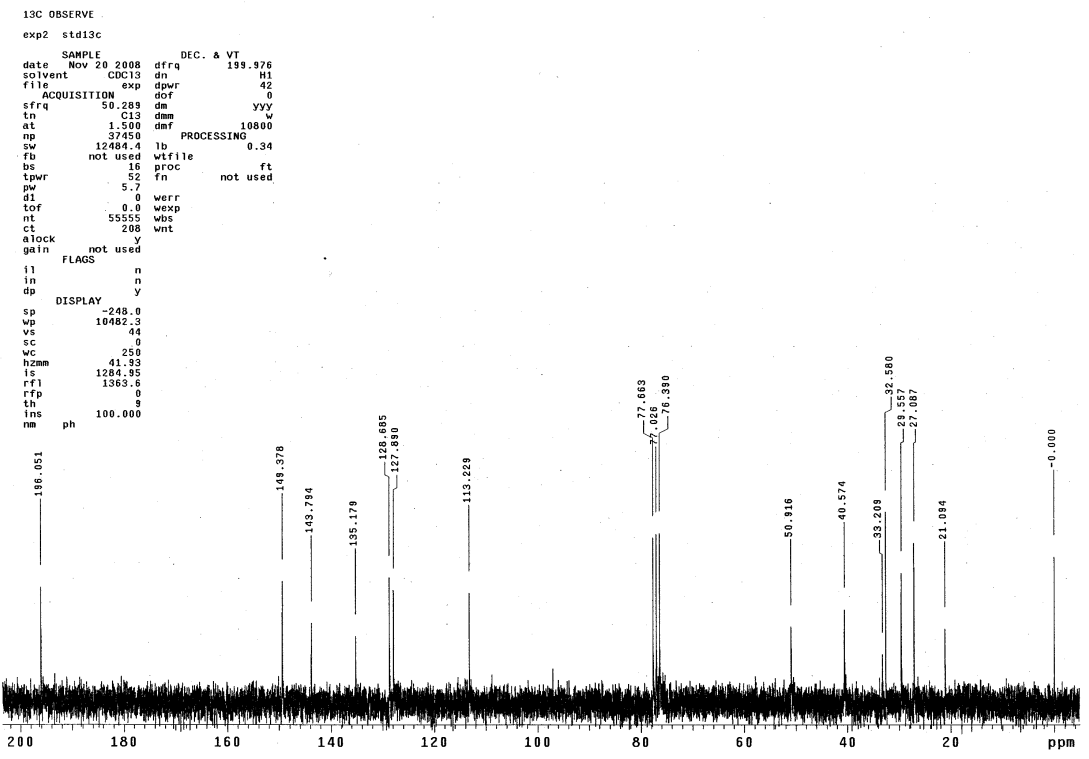

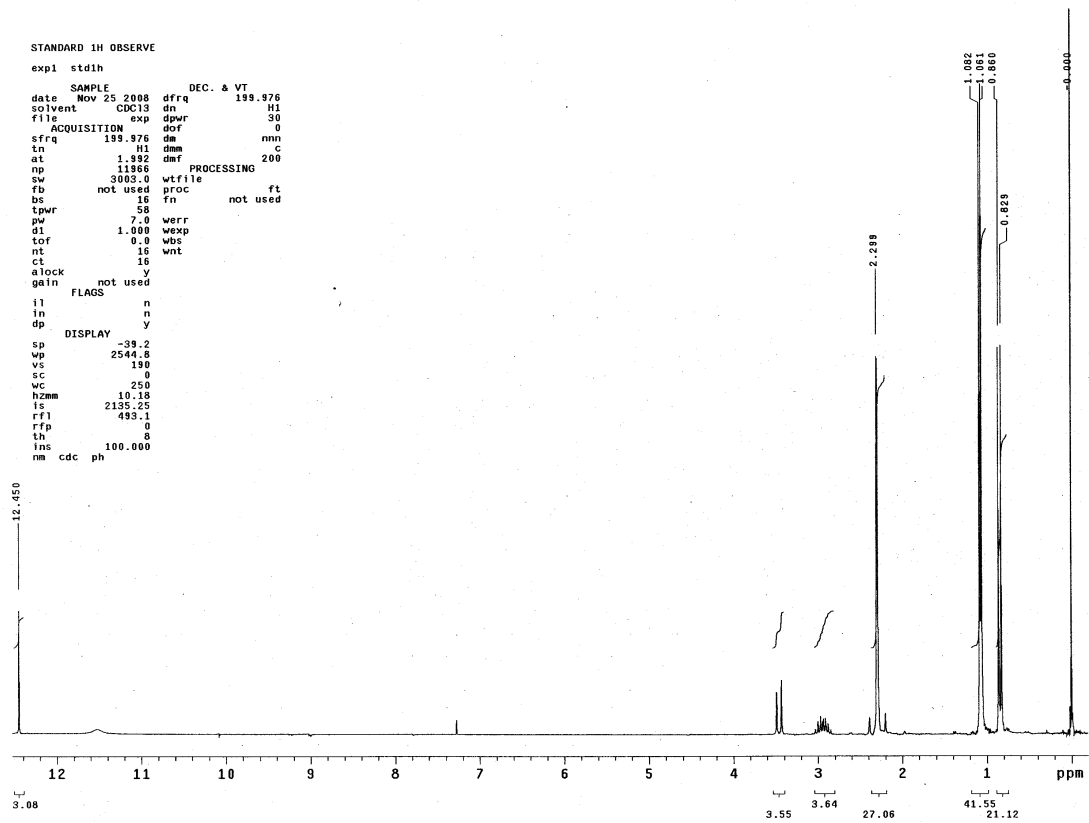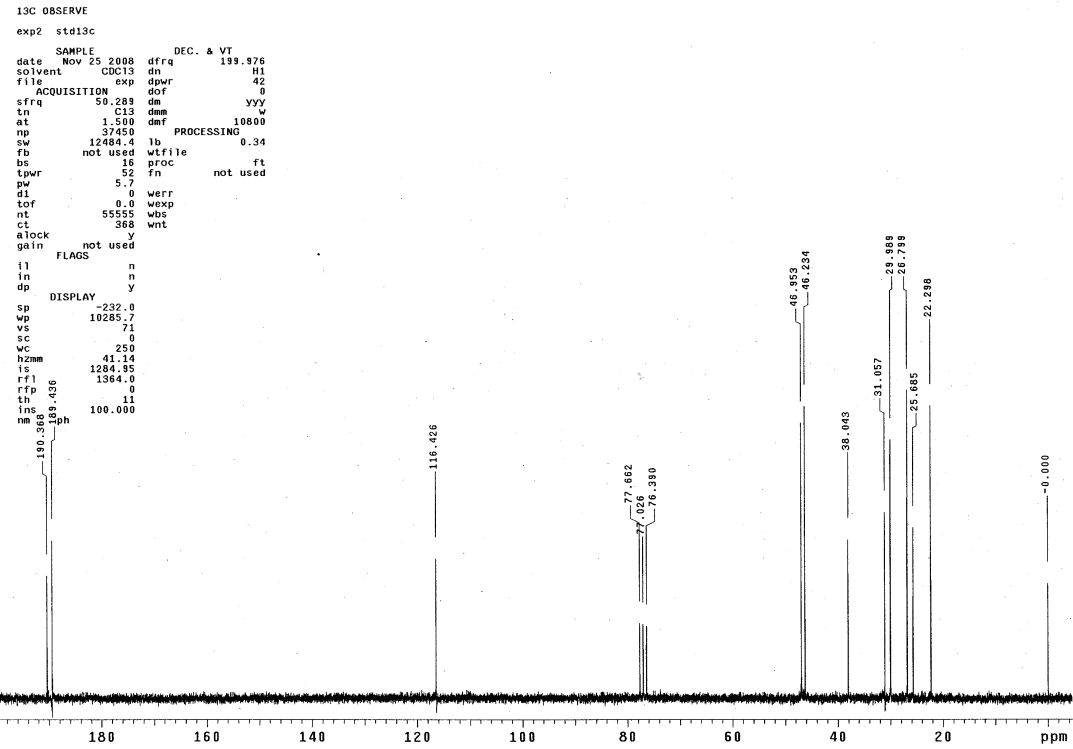

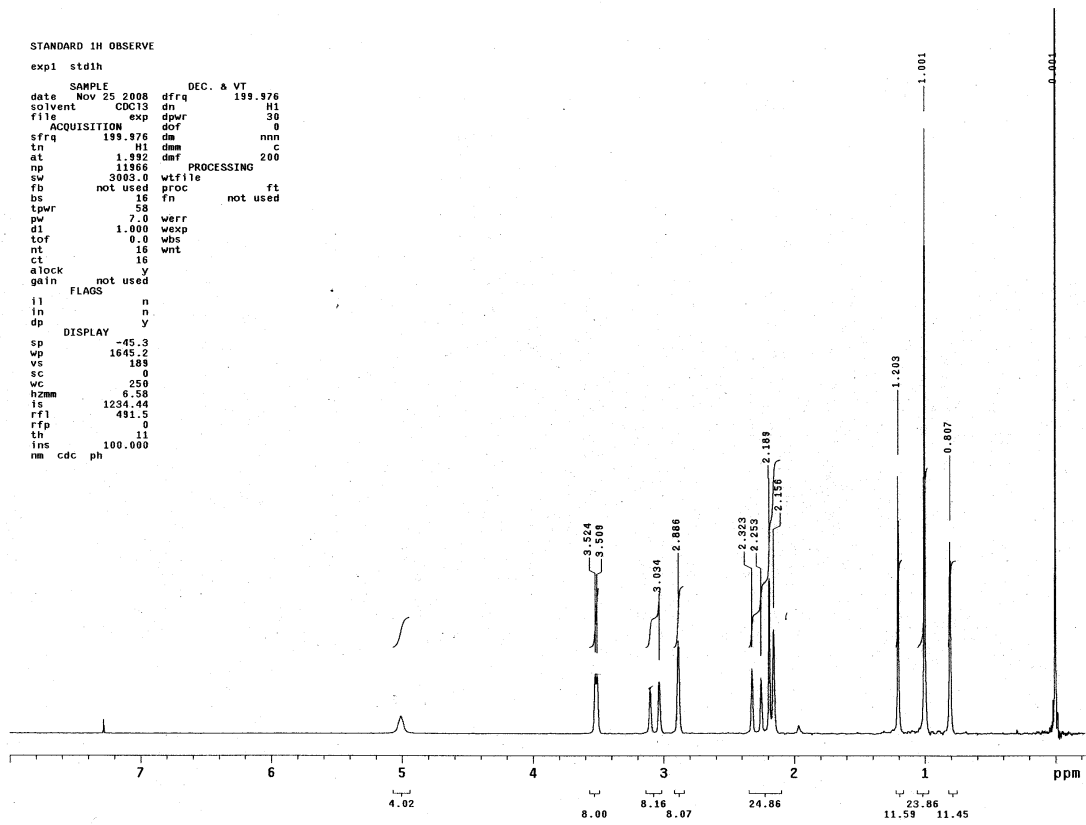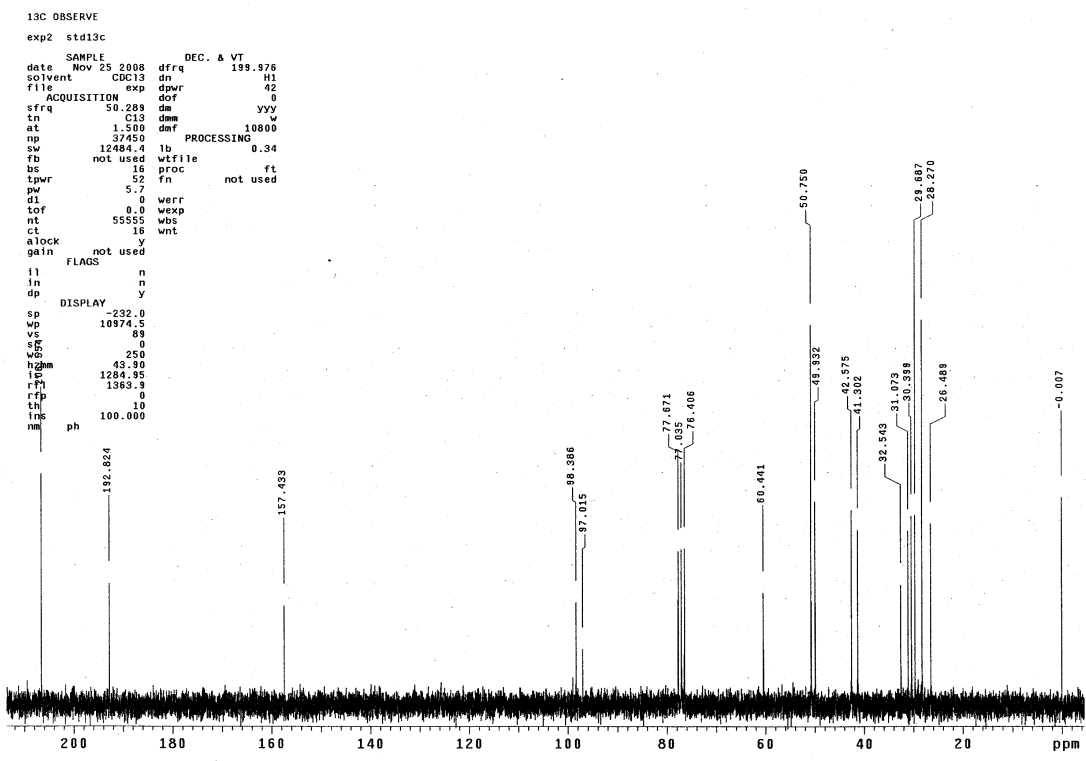

Supplement: c1ra01135a.pdf [file c1ra01135a.pdf]
